# Supplementary material for: Memantine Improves Cognitive Function and Alters Hippocampal and Cortical Proteome in Triple Transgenic Mouse Model of Alzheimer's Disease
Source: PubMed Central journal article supplement — Exp Neurobiol. 2019 Jun 26;28(3):390–403. doi: 10.5607/en.2019.28.3.390 (PMC6614075; doi:10.5607/en.2019.28.3.390), 2019-06-26
Supplement: en-28-390-s001.pdf [file en-28-390-s001.pdf]

## SUPPORTING INFORMATION

# Memantine Improved Cognitive Function and Altered Hippocampal and Cortical Proteome in Triple Transgenic Mouse Model of Alzheimer's Disease

Xinhua Zhou<sup>1†</sup>, Liang Wang<sup>2†</sup>, Wei Xiao<sup>3</sup>, Zhiyang Su<sup>4</sup>, Chengyou Zheng<sup>4</sup>, Zaijun Zhang<sup>4</sup>, Yuqiang Wang<sup>4</sup>, Benhong Xu<sup>5</sup>, Xifei Yang<sup>5\*</sup> and Maggie Pui Man Hoi<sup>1\*</sup>

*<sup>1</sup>State Key Laboratory of Quality Research in Chinese Medicine and Institute of Chinese Medical Sciences, University of Macau, Macau SAR 999078, China, <sup>2</sup>Institute of Biomedical and Pharmaceutical Sciences, Guangdong University of Technology, Guangzhou 510000, China, <sup>3</sup>College of Letters & Science, University of Wisconsin- Madison, Madison 53706, Wisconsin, United States, <sup>4</sup>Institute of New Drug Research and Guangdong Province Key Laboratory of Pharmacodynamic Constituents of Traditional Chinese Medicine, Jinan University College of Pharmacy, Guangzhou 510000, China, <sup>5</sup>Key Laboratory of Modern Toxicology of Shenzhen, Shenzhen Center for Disease Control and Prevention, Shenzhen 518000, China*

\*To whom correspondence should be addressed.

Xifei Yang: TEL:86-0755-2550 8584, FAX: 86-0755-2550 8584, e-mail:xifeiyang@gmail.com

Maggie Pui Man Hoi: TEL: 853-8822 4876, FAX: 853-2884 1358, e-mail: maghoi@um.edu.mo

†These authors contributed equally to this work.

## Table of the contents

|                                                                                                                  |    |
|------------------------------------------------------------------------------------------------------------------|----|
| Table S-1. 233 proteins in the hippocampus that were significantly changed by memantine treatment. ....          | 2  |
| Table S-2. The 40 proteins in the hippocampus that were changed significantly by memantine treatment. ....       | 18 |
| Table S-3. 342 proteins in the cerebral cortex that were significantly changed by memantine treatment. ....      | 22 |
| Table S-4. The 50 proteins in the cerebral cortical that were changed significantly by memantine treatment. .... | 46 |

**Table S-1. 233 proteins in the hippocampus that were significantly changed by memantine treatment.**

**Table S-1. 233 proteins in the hippocampus that were significantly changed by memantine treatment.** These proteins have met the criteria, the ratio of memantine / AD in expression levels of at least 1.2-fold ( up-regulation ) or at least <0.83-fold (down-regulation) as defined in the experimental procedures.

| Accession | Protein name | Description                                                                 | Ratio |              |              | Unique | -10lgP |
|-----------|--------------|-----------------------------------------------------------------------------|-------|--------------|--------------|--------|--------|
|           |              |                                                                             | AD/WT | Memantine/WT | Memantine/AD |        |        |
| P48725    | PCNT         | Pericentrin, GN=Pcnt                                                        | 0.79  | 2.83         | 3.58         | 1      | 66.89  |
| Q5SX46    | Q5SX46       | Mitochondrial 2-oxoglutarate/malate carrier protein (Fragment), GN=Slc25a11 | 1.48  | 4.12         | 2.78         | 1      | 200.12 |
| E9QM77    | E9QM77       | Ataxin-2, GN=Atxn2                                                          | 0.65  | 1.54         | 2.37         | 1      | 55.46  |
| E9Q555    | RN213        | E3 ubiquitin-protein ligase RNF213, GN=Rnf213                               | 0.8   | 1.88         | 2.35         | 1      | 65.4   |
| P29387    | GBB4         | Guanine nucleotide-binding protein subunit beta-4, GN=Gnb4                  | 1.15  | 2.62         | 2.28         | 2      | 172.11 |
| Q5SGK3    | AOXB         | Aldehyde oxidase 2, GN=Aox2                                                 | 1.53  | 3.36         | 2.20         | 1      | 19.72  |
| Q80WM5    | HPLN3        | Hyaluronan and proteoglycan link protein 3, GN=Hapln3                       | 0.9   | 1.97         | 2.19         | 1      | 97.78  |
| Q9Z0J1    | RECK         | Reversion-inducing cysteine-rich protein with Kazal motifs, GN=Reck         | 1.1   | 2.19         | 1.99         | 1      | 20.71  |
| P83510    | TNIK         | Traf2 and NCK-interacting protein kinase, GN=Tnik                           | 1.26  | 2.49         | 1.98         | 2      | 173.49 |

|            |            |                                                                       |      |      |      |   |        |
|------------|------------|-----------------------------------------------------------------------|------|------|------|---|--------|
| Q9ERB0     | SNP29      | Synaptosomal-associated protein 29, GN=Snap29                         | 0.89 | 1.75 | 1.97 | 3 | 91.63  |
| Q9D1X0     | NOL3       | Nucleolar protein 3, GN=Nol3                                          | 0.79 | 1.41 | 1.78 | 2 | 109.74 |
| Q8BGJ9     | U2AF4      | Splicing factor U2AF 26 kDa subunit, GN=U2af114                       | 0.62 | 1.03 | 1.66 | 1 | 38.17  |
| Q9D883     | U2AF1      | Splicing factor U2AF 35 kDa subunit, GN=U2af1                         | 0.62 | 1.03 | 1.66 | 1 | 38.17  |
| Q99JH7     | CSTN3      | Calsyntenin-3, GN=Clstn3                                              | 0.73 | 1.18 | 1.62 | 1 | 20.68  |
| Q5HZI2     | C2C4C      | C2 calcium-dependent domain-containing protein 4C, GN=C2cd4cC2CD4     | 0.83 | 1.3  | 1.57 | 1 | 44.94  |
| P56371     | RAB4A      | Ras-related protein Rab-4A, GN=Rab4a                                  | 1.15 | 1.78 | 1.55 | 1 | 115.33 |
| P20065     | TYB4       | Thymosin beta-4, GN=Tmsb4x                                            | 1.14 | 1.75 | 1.54 | 4 | 134.25 |
| A2ARZ7     | A2ARZ7     | RAB22A member RAS oncogene family isoform CRA_c, GN=Rab22a            | 0.98 | 1.5  | 1.53 | 2 | 89.67  |
| Q9JMD0     | ZN207      | BUB3-interacting and GLEBS motif-containing protein ZNF207, GN=Znf207 | 0.79 | 1.2  | 1.52 | 1 | 71.53  |
| A0A0J9YUM2 | A0A0J9YUM2 | Ras/Rap GTPase-activating protein SynGAP (Fragment), GN=Syngap1       | 1.41 | 2.14 | 1.52 | 1 | 323.14 |
| Q9Z2H2     | RGS6       | Regulator of G-protein signaling 6, GN=Rgs6                           | 0.99 | 1.5  | 1.52 | 3 | 112.67 |
| A0A0A6YW90 | A0A0A6YW90 | Glutamate receptor 2, GN=Gria2                                        | 0.8  | 1.21 | 1.51 | 1 | 269.66 |
| Q6NVD9     | BFSP2      | Phakinin, GN=Bfsp2                                                    | 0.92 | 1.39 | 1.51 | 1 | 19.64  |
| Q810U3     | NFASC      | Neurofascin, GN=Nfasc                                                 | 1.01 | 1.51 | 1.50 | 1 | 326.06 |

|            |            |                                                                |      |      |      |   |        |
|------------|------------|----------------------------------------------------------------|------|------|------|---|--------|
| P53702     | CCHL       | Cytochrome c-type heme lyase, GN=Hccs                          | 0.68 | 1    | 1.47 | 1 | 62.75  |
| O54781     | SRPK2      | SRSF protein kinase 2, GN=Srpk2                                | 0.78 | 1.14 | 1.46 | 2 | 98.99  |
| Q68EF0     | RAB3I      | Rab-3A-interacting protein, GN=Rab3ip                          | 0.92 | 1.34 | 1.46 | 1 | 59.47  |
| A0A1W2P7K6 | A0A1W2P7K6 | RAB3A interacting protein isoform CRA_b, GN=Rab3ip             | 0.92 | 1.34 | 1.46 | 1 | 59.47  |
| P63054     | PCP4       | Purkinje cell protein 4, GN=Pcp4                               | 0.82 | 1.17 | 1.43 | 1 | 112.09 |
| D3YXH0     | D3YXH0     | Immunoglobulin superfamily member 5, GN=Igsf5                  | 0.82 | 1.17 | 1.43 | 1 | 112.09 |
| Q9D0J4     | ARL2       | ADP-rib, GN=ylation factor-like protein 2, GN=Arl2             | 0.87 | 1.24 | 1.43 | 1 | 86.81  |
| Q8K4I3     | ARHG6      | Rho guanine nucleotide exchange factor 6, GN=Arhgef6           | 0.64 | 0.91 | 1.42 | 1 | 115.51 |
| Q6Y685     | TACC1      | Transforming acidic coiled-coil-containing protein 1, GN=Tacc1 | 0.88 | 1.25 | 1.42 | 1 | 87.34  |
| Q9JKX6     | NUDT5      | ADP-sugar pyrophosphatase, GN=Nudt5                            | 1    | 1.42 | 1.42 | 1 | 84.38  |
| Q921U8     | SMTN       | Smoothelin, GN=Smtn                                            | 0.79 | 1.12 | 1.42 | 1 | 37.61  |
| A2A9C3     | SZT2       | KICSTOR complex protein SZT2, GN=Szt2                          | 0.82 | 1.16 | 1.41 | 1 | 41.34  |
| P97785     | GFRA1      | GDNF family receptor alpha-1, GN=Gfra1                         | 0.99 | 1.4  | 1.41 | 2 | 69.39  |
| O70456     | 1433S      | 14-3-3 protein sigma, GN=Sfn                                   | 1.04 | 1.47 | 1.41 | 1 | 135.38 |
| B0F2B4     | NLGN4      | Neuroigin 4-like, GN=Nlgn4l                                    | 0.88 | 1.24 | 1.41 | 1 | 121.65 |
| A0A0R4J034 | A0A0R4J034 | MCG129810 isoform CRA_c, GN=Pdxdc1                             | 0.94 | 1.32 | 1.40 | 1 | 101.7  |

|            |            |                                                                         |      |      |      |   |        |
|------------|------------|-------------------------------------------------------------------------|------|------|------|---|--------|
| Q9WTP6     | KAD2       | Adenylate kinase 2 mitochondrial,<br>GN=Ak2                             | 0.96 | 1.34 | 1.40 | 2 | 144.13 |
| Q9ESC8     | AFF4       | AF4/FMR2 family member 4, GN=Aff4                                       | 1.16 | 1.61 | 1.39 | 1 | 19.96  |
| A0A0R4J1E3 | A0A0R4J1E3 | Drebrin, GN=Dbn1                                                        | 0.86 | 1.19 | 1.38 | 1 | 256.64 |
| E9Q9J6     | E9Q9J6     | Plectin (Fragment), GN=Plec                                             | 1.07 | 1.47 | 1.37 | 1 | 223.55 |
| Q9CQY6     | UQCC2      | Ubiquinol-cytochrome-c reductase complex<br>assembly factor 2, GN=Uqcc2 | 0.82 | 1.12 | 1.37 | 1 | 107.45 |
| Q8BQZ4     | RLGPB      | Ral GTPase-activating protein subunit beta,<br>GN=Ralgapb               | 1.15 | 1.57 | 1.37 | 1 | 101.97 |
| Q9CQ45     | NENF       | Neudesin, GN=Nenf                                                       | 0.86 | 1.17 | 1.36 | 1 | 51.5   |
| Q8VE62     | PAIP1      | Polyadenylate-binding protein-interacting<br>protein 1, GN=Paip1        | 0.87 | 1.18 | 1.36 | 3 | 88.99  |
| Q9DB41     | GHC2       | Mitochondrial glutamate carrier 2,<br>GN=Slc25a18                       | 1.07 | 1.45 | 1.36 | 2 | 169.05 |
| P50171     | DHB8       | Estradiol 17-beta-dehydrogenase 8,<br>GN=Hsd17b8                        | 0.99 | 1.34 | 1.35 | 2 | 189.78 |
| J3QN87     | J3QN87     | Eukaryotic translation initiation factor 1<br>(Fragment), GN=Eif1       | 1.02 | 1.38 | 1.35 | 1 | 86.88  |
| Q9DBN4     | P33MX      | Putative monooxygenase p33MONOX,<br>GN=P33monox                         | 0.94 | 1.27 | 1.35 | 1 | 36.83  |
| Q9CQ40     | RM49       | 39S rib, GN=omal protein L49<br>mitochondrial, GN=Mrpl49                | 1.15 | 1.55 | 1.35 | 1 | 62.99  |
| Q9CX80     | CYGB       | Cytoglobin, GN=Cygb                                                     | 0.72 | 0.97 | 1.35 | 2 | 65.15  |
| Q8CJ40     | CROCC      | Rootletin, GN=Crocc                                                     | 0.99 | 1.33 | 1.34 | 1 | 55.95  |

|            |            |                                                                                                               |      |      |      |    |        |
|------------|------------|---------------------------------------------------------------------------------------------------------------|------|------|------|----|--------|
| P50247     | SAHH       | Adenosylhomocysteinase, GN=Ahcy                                                                               | 1.03 | 1.38 | 1.34 | 11 | 189.07 |
| Q9CQ19     | MYL9       | Myosin regulatory light polypeptide 9,<br>GN=Myl9                                                             | 0.8  | 1.07 | 1.34 | 1  | 147.23 |
| H3BKU1     | H3BKU1     | Protein phosphatase 2 (Formerly 2A)<br>regulatory subunit A (PR 65) beta isoform<br>isoform CRA_b, GN=Ppp2r1b | 1.43 | 1.91 | 1.34 | 1  | 199.62 |
| Q64338     | PDE1C      | Calcium/calmodulin-dependent 3' 5'-cyclic<br>nucleotide phosphodiesterase 1C,<br>GN=Pde1c                     | 0.88 | 1.17 | 1.33 | 1  | 72.4   |
| Q62348     | TSN        | Translin, GE=Tsn                                                                                              | 0.89 | 1.18 | 1.33 | 1  | 90.24  |
| P61924     | COPZ1      | Coatomer subunit zeta-1, GN=Copz1                                                                             | 1.02 | 1.35 | 1.32 | 1  | 48.26  |
| A0A140LHQ8 | A0A140LHQ8 | Phosphatidylinositol-binding clathrin<br>assembly protein (Fragment), GN=Picalm                               | 0.93 | 1.22 | 1.31 | 1  | 183.87 |
| D3Z7J6     | D3Z7J6     | Translation initiation factor eIF-2B subunit<br>beta (Fragment), GN=Eif2b2                                    | 0.9  | 1.18 | 1.31 | 1  | 19.96  |
| P57722     | PCBP3      | Poly(rC)-binding protein 3, GN=Pcbp3                                                                          | 0.87 | 1.14 | 1.31 | 1  | 150.78 |
| Q99NE5     | RIMS1      | Regulating synaptic membrane exocytosis<br>protein 1, GN=Rims1                                                | 0.91 | 1.19 | 1.31 | 1  | 202.93 |
| Q920N7     | SYT12      | Synaptotagmin-12, GN=Syt12                                                                                    | 0.88 | 1.15 | 1.31 | 2  | 101.55 |
| Q4V9Z5     | SE6L2      | Seizure 6-like protein 2, GN=Sez6l2                                                                           | 0.69 | 0.9  | 1.30 | 1  | 103.48 |
| Q99P58     | RB27B      | Ras-related protein Rab-27B, GN=Rab27b                                                                        | 0.85 | 1.1  | 1.29 | 1  | 114.43 |
| Q5SXY1     | CYTSB      | Cytospin-B, GN=Specc1                                                                                         | 0.82 | 1.06 | 1.29 | 2  | 120.28 |

|        |        |                                                                                 |      |      |      |   |        |
|--------|--------|---------------------------------------------------------------------------------|------|------|------|---|--------|
| P24668 | MPRD   | Cation-dependent mannose-6-phosphate receptor, GN=M6pr                          | 1.07 | 1.38 | 1.29 | 3 | 136.09 |
| Q8BHE3 | ATCAY  | Caytaxin, GN=Atcay                                                              | 0.94 | 1.21 | 1.29 | 3 | 164.01 |
| P59279 | RAB2B  | Ras-related protein Rab-2B, GN=Rab2b                                            | 0.84 | 1.08 | 1.29 | 1 | 201.2  |
| Q9D4E6 | Q9D4E6 | Polyadenylate-binding protein, GN=Pabpc6                                        | 0.99 | 1.27 | 1.28 | 1 | 184.45 |
| Q80WQ2 | VAC14  | Protein VAC14 homolog, GN=Vac14                                                 | 1.23 | 1.57 | 1.28 | 1 | 102.85 |
| Q68ED7 | CRTC1  | CREB-regulated transcription coactivator 1, GN=Crtc1                            | 0.8  | 1.02 | 1.28 | 2 | 123.79 |
| Q9QXT0 | CNPY2  | Protein canopy homolog 2, GN=Cnpy2                                              | 0.88 | 1.12 | 1.27 | 2 | 142.4  |
| O08582 | GTPB1  | GTP-binding protein 1, GN=Gtpbp1                                                | 0.92 | 1.17 | 1.27 | 4 | 122.49 |
| Q80UM3 | NAA15  | N-alpha-acetyltransferase 15 NatA auxiliary subunit, GN=Naa15                   | 0.96 | 1.22 | 1.27 | 7 | 98.88  |
| P68181 | KAPCB  | cAMP-dependent protein kinase catalytic subunit beta, GN=Prkacb                 | 0.85 | 1.08 | 1.27 | 3 | 166.15 |
| Q8R010 | AIMP2  | Aminoacyl tRNA synthase complex-interacting multifunctional protein 2, GN=Aimp2 | 0.85 | 1.08 | 1.27 | 2 | 128.04 |
| P32848 | PRVA   | Parvalbumin alpha, GN=Pvalb                                                     | 0.89 | 1.13 | 1.27 | 6 | 169.03 |
| Q99J77 | SIAS   | Sialic acid synthase, GN=Nans                                                   | 0.93 | 1.18 | 1.27 | 2 | 116.88 |
| Q6P4T2 | U520   | U5 small nuclear ribonucleoprotein 200 kDa helicase, GN=Snrnp200                | 0.82 | 1.04 | 1.27 | 3 | 126.95 |
| P31650 | S6A11  | Sodium- and chloride-dependent GABA transporter 3, GN=Slc6a11                   | 0.97 | 1.23 | 1.27 | 6 | 193.18 |

|        |        |                                                                          |      |      |      |   |        |
|--------|--------|--------------------------------------------------------------------------|------|------|------|---|--------|
| Q80UW2 | FBX2   | F-box only protein 2, GN=Fbxo2                                           | 0.98 | 1.24 | 1.27 | 8 | 196.78 |
| E9PYX6 | E9PYX6 | Sorbin and SH3 domain-containing protein 1, GN=Sorbs1                    | 1.06 | 1.34 | 1.26 | 1 | 188.03 |
| Q811G0 | PTHB1  | Protein PTHB1, GN=Bbs9                                                   | 1.07 | 1.35 | 1.26 | 1 | 40.98  |
| E0CXD4 | E0CXD4 | Protocadherin 1, GN=Pcdh1                                                | 0.73 | 0.92 | 1.26 | 1 | 175.79 |
| Q8BGX2 | TIM29  | Mitochondrial import inner membrane translocase subunit Tim29, GN=Timm29 | 0.89 | 1.12 | 1.26 | 1 | 148.54 |
| Q8CCT4 | TCAL5  | Transcription elongation factor A protein-like 5, GN=Tceal5              | 0.99 | 1.24 | 1.25 | 2 | 140.44 |
| Q6PGN3 | DCLK2  | Serine/threonine-protein kinase DCLK2, GN=Dclk2                          | 1.03 | 1.29 | 1.25 | 8 | 195.13 |
| E0CYG3 | E0CYG3 | Sperm flagellar protein 2, GN=Spef2                                      | 0.76 | 0.95 | 1.25 | 1 | 26.76  |
| Q8R191 | SNG3   | Synaptogyrin-3, GN=Syngr3                                                | 1.01 | 1.26 | 1.25 | 2 | 120.81 |
| Q91Z61 | DIRA1  | GTP-binding protein Di-Ras1, GN=Diras1                                   | 1.01 | 1.26 | 1.25 | 3 | 118.17 |
| A2AQJ8 | A2AQJ8 | Neutral alpha-glucosidase C, GN=Ganc                                     | 0.93 | 1.16 | 1.25 | 1 | 21.34  |
| Q08331 | CALB2  | Calretinin, GN=Calb2                                                     | 0.89 | 1.11 | 1.25 | 9 | 184.92 |
| Q8CBY8 | DCTN4  | Dynactin subunit 4, GN=Dctn4                                             | 1.15 | 1.43 | 1.24 | 8 | 161.63 |
| E9Q2W9 | E9Q2W9 | Alpha-actinin-4 (Fragment), GN=Actn4                                     | 0.83 | 1.03 | 1.24 | 1 | 270.34 |
| P53996 | CNBP   | Cellular nucleic acid-binding protein, GN=Cnbp                           | 1.08 | 1.34 | 1.24 | 1 | 94.04  |
| Q8R5M8 | CADM1  | Cell adhesion molecule 1, GN=Cadm1                                       | 0.91 | 1.12 | 1.23 | 1 | 204.7  |



|            |            |                                                                                       |      |      |      |   |        |
|------------|------------|---------------------------------------------------------------------------------------|------|------|------|---|--------|
| Q9CPU4     | MGST3      | Microsomal glutathione S-transferase 3,<br>GN=Mgst3                                   | 0.91 | 1.12 | 1.23 | 2 | 97.46  |
| Q8VHL1     | SETD7      | Histone-lysine N-methyltransferase SETD7,<br>GN=Setd7                                 | 0.87 | 1.07 | 1.23 | 3 | 107.42 |
| Q921E2     | RAB31      | Ras-related protein Rab-31, GN=Rab31                                                  | 0.96 | 1.18 | 1.23 | 4 | 110.99 |
| Q9Z2D3     | DFNA5      | Non-syndromic hearing impairment protein<br>5 homolog, GN=Dfna5                       | 0.96 | 1.18 | 1.23 | 1 | 68.16  |
| Q8R527     | RHOQ       | Rho-related GTP-binding protein RhoQ,<br>GN=Rhoq                                      | 0.79 | 0.97 | 1.23 | 1 | 94.34  |
| P63137     | GBRB2      | Gamma-aminobutyric acid receptor subunit<br>beta-2, GN=Gabrb2                         | 0.97 | 1.19 | 1.23 | 1 | 147.81 |
| Q9CWE0     | MFR1L      | Mitochondrial fission regulator 1-like,<br>GN=Mtfr1l                                  | 0.89 | 1.09 | 1.22 | 2 | 152.66 |
| Q64253     | LY6E       | Lymphocyte antigen 6E, GN=Ly6e                                                        | 0.98 | 1.2  | 1.22 | 1 | 41.3   |
| E9PWG2     | E9PWG2     | Trafficking protein particle complex 8,<br>GN=Trappc8                                 | 0.98 | 1.2  | 1.22 | 1 | 108.11 |
| P11352     | GPX1       | Glutathione peroxidase 1, GN=Gpx1                                                     | 0.9  | 1.1  | 1.22 | 4 | 134.33 |
| Q9CZJ2     | HS12B      | Heat shock 70 kDa protein 12B,<br>GN=Hspa12b                                          | 1.08 | 1.32 | 1.22 | 1 | 131.6  |
| Q8CGA4     | MTURN      | Maturin, GN=Mturn                                                                     | 0.81 | 0.99 | 1.22 | 1 | 23.78  |
| Q7SIG6     | ASAP2      | Arf-GAP with SH3 domain ANK repeat<br>and PH domain-containing protein 2,<br>GN=Asap2 | 0.95 | 1.16 | 1.22 | 1 | 86.75  |
| A0A087WPR7 | A0A087WPR7 | Dystonin (Fragment), GN=Dst                                                           | 0.68 | 0.83 | 1.22 | 1 | 92.07  |
| P35569     | IRS1       | Insulin receptor substrate 1, GN=Irs1                                                 | 1.18 | 1.44 | 1.22 | 1 | 19.6   |

|        |        |                                                                                      |      |      |      |    |        |
|--------|--------|--------------------------------------------------------------------------------------|------|------|------|----|--------|
| Q9JHW2 | NIT2   | Omega-amidase NIT2, GN=Nit2                                                          | 0.96 | 1.17 | 1.22 | 4  | 148.19 |
| P12023 | A4     | Amyloid beta A4 protein, GN=App                                                      | 1.83 | 2.23 | 1.22 | 13 | 254.95 |
| Q3V132 | ADT4   | ADP/ATP translocase 4, GN=Slc25a31                                                   | 0.87 | 1.06 | 1.22 | 1  | 136.77 |
| Q8VCH8 | UBXN4  | UBX domain-containing protein 4,<br>GN=Ubxn4                                         | 0.79 | 0.96 | 1.22 | 2  | 136.3  |
| H3BJD6 | H3BJD6 | Protein phosphatase 1 regulatory<br>(inhibitor) subunit 9A, GN=Ppp1r9a               | 1.07 | 1.3  | 1.21 | 6  | 201.42 |
| P62715 | PP2AB  | Serine/threonine-protein phosphatase 2A<br>catalytic subunit beta isoform, GN=Ppp2cb | 0.84 | 1.02 | 1.21 | 1  | 229.03 |
| Q9Z110 | P5CS   | Delta-1-pyrroline-5-carboxylate synthase,<br>GN=Aldh18a1                             | 0.84 | 1.02 | 1.21 | 2  | 117.19 |
| P12787 | COX5A  | Cytochrome c oxidase subunit 5A<br>mitochondrial, GN=Cox5a                           | 0.94 | 1.14 | 1.21 | 11 | 216.43 |
| Q91X72 | HEMO   | Hemopexin, GN=Hpx                                                                    | 0.8  | 0.97 | 1.21 | 3  | 71.12  |
| Q8VBW6 | ULA1   | NEDD8-activating enzyme E1 regulatory<br>subunit, GN=Nae1                            | 1    | 1.21 | 1.21 | 6  | 140.6  |
| P15532 | NDKA   | Nucleoside diphosphate kinase A,<br>GN=Nme1                                          | 0.91 | 1.1  | 1.21 | 2  | 224.72 |
| P53612 | PGTB2  | Geranylgeranyl transferase type-2 subunit<br>beta, GN=Rabggtb                        | 0.91 | 1.1  | 1.21 | 1  | 76.53  |
| Q61768 | KINH   | Kinesin-1 heavy chain, GN=Kif5b                                                      | 0.96 | 1.16 | 1.21 | 5  | 229.54 |
| S4R294 | S4R294 | Protein PRRC2C, GN=Prrc2c                                                            | 0.96 | 1.16 | 1.21 | 1  | 39.68  |
| Q9DCM0 | ETHE1  | Persulfide dioxygenase ETHE1<br>mitochondrial, GN=Ethe1                              | 1.25 | 1.51 | 1.21 | 1  | 103.82 |

|        |        |                                                                 |      |      |      |   |        |
|--------|--------|-----------------------------------------------------------------|------|------|------|---|--------|
| P46097 | SYT2   | Synaptotagmin-2, GN=Synt2                                       | 1.02 | 1.23 | 1.21 | 5 | 177.57 |
| P26041 | MOES   | Moesin, GN=Msn                                                  | 0.98 | 1.18 | 1.20 | 3 | 188.43 |
| P28352 | APEX1  | DNA-(apurinic or apyrimidinic site) lyase,<br>GN=Apex1          | 0.98 | 1.18 | 1.20 | 2 | 107.21 |
| P27661 | H2AX   | Histone H2AX, GN=H2afx                                          | 0.84 | 1.01 | 1.20 | 1 | 139.35 |
| Q9DB73 | NB5R1  | NADH-cytochrome b5 reductase 1,<br>GN=Cyb5r1                    | 1.04 | 1.25 | 1.20 | 5 | 177.1  |
| Q3TIR3 | RIC8A  | Synembryn-A, GN=Ric8a                                           | 1.09 | 1.31 | 1.20 | 1 | 146.96 |
| Q8R555 | CRAC1  | Cartilage acidic protein 1, GN=Crtac1                           | 1.09 | 1.31 | 1.20 | 1 | 53.89  |
| Q9DBP5 | KCY    | UMP-CMP kinase, GN=Cmpk1                                        | 0.85 | 1.02 | 1.20 | 6 | 181.52 |
| P84075 | HPCA   | Neuron-specific calcium-binding protein<br>hippocalcin, GN=Hpca | 0.99 | 0.82 | 0.83 | 5 | 206.59 |
| A2BFF9 | A2BFF9 | Cytoplasmic dynein 1 intermediate chain 2,<br>GN=Dync1i2        | 1.28 | 1.06 | 0.83 | 2 | 160.14 |
| O08808 | DIAP1  | Protein diaphanous homolog 1, GN=Diaph1                         | 1.16 | 0.96 | 0.83 | 2 | 132.11 |
| A2A8L5 | PTPRF  | Receptor-type tyrosine-protein ph,<br>GN=phatase F, GN=Ptpfr    | 1.04 | 0.86 | 0.83 | 2 | 145.58 |
| Q68FL6 | SYMC   | Methionine--tRNA ligase cytoplasmic,<br>GN=Mars                 | 1.02 | 0.84 | 0.82 | 3 | 79.3   |
| Q3TRM8 | HXK3   | Hexokinase-3, GN=Hk3                                            | 1.58 | 1.3  | 0.82 | 1 | 83.68  |
| Q60575 | KIF1B  | Kinesin-like protein KIF1B, GN=Kif1b                            | 1.34 | 1.1  | 0.82 | 1 | 132.5  |
| P55258 | RAB8A  | Ras-related protein Rab-8A, GN=Rab8a                            | 1.11 | 0.91 | 0.82 | 1 | 170.35 |

|        |        |                                                                             |      |      |      |    |        |
|--------|--------|-----------------------------------------------------------------------------|------|------|------|----|--------|
| P50571 | GBRB1  | Gamma-aminobutyric acid receptor subunit beta-1, GN=Gabrb1                  | 1.44 | 1.18 | 0.82 | 1  | 141.79 |
| Q9WUK4 | RFC2   | Replication factor C subunit 2, GN=Rfc2                                     | 0.92 | 0.75 | 0.82 | 1  | 19.92  |
| G3UZJ2 | G3UZJ2 | Microtubule-associated protein (Fragment), GN=Map2                          | 1.19 | 0.97 | 0.82 | 1  | 182.93 |
| Q8VE70 | PDC10  | Programmed cell death protein 10, GN=Pdcd10                                 | 1.35 | 1.1  | 0.81 | 1  | 66.98  |
| Q7TNB5 | Q7TNB5 | Glutamate receptor 1, GN=Gria1                                              | 1.08 | 0.88 | 0.81 | 1  | 259.16 |
| Q02614 | S30BP  | SAP30-binding protein, GN=Sap30bp                                           | 1.29 | 1.05 | 0.81 | 1  | 62.9   |
| P63087 | PP1G   | Serine/threonine-protein phosphatase PP1-gamma catalytic subunit, GN=Ppp1cc | 1.12 | 0.91 | 0.81 | 1  | 237.6  |
| Q3UV17 | K22O   | Keratin type II cytoskeletal 2 oral, GN=Krt76                               | 0.8  | 0.65 | 0.81 | 1  | 67.92  |
| P47743 | GRM8   | Metabotropic glutamate receptor 8, GN=Grm8                                  | 1.22 | 0.99 | 0.81 | 1  | 42.57  |
| Q8CBB6 | Q8CBB6 | Histone H2B, GN=Hist1h2bq                                                   | 0.89 | 0.72 | 0.81 | 2  | 156.27 |
| Q61036 | PAK3   | Serine/threonine-protein kinase PAK 3, GN=Pak3                              | 0.99 | 0.8  | 0.81 | 2  | 197.78 |
| P97952 | SCN1B  | Sodium channel subunit beta-1, GN=Scn1b                                     | 1.19 | 0.96 | 0.81 | 1  | 88.36  |
| Q9DCH4 | EIF3F  | Eukaryotic translation initiation factor 3 subunit F, GN=Eif3f              | 1.39 | 1.12 | 0.81 | 3  | 97.58  |
| O70274 | TP4A2  | Protein tyrosine phosphatase type IVA 2, GN=Ptp4a2                          | 0.77 | 0.62 | 0.81 | 1  | 69.08  |
| P35438 | NMDZ1  | Glutamate receptor ionotropic NMDA 1, GN=Grin1                              | 1.18 | 0.95 | 0.81 | 12 | 210.43 |

|        |        |                                                                                        |      |      |      |    |        |
|--------|--------|----------------------------------------------------------------------------------------|------|------|------|----|--------|
| F7AA26 | F7AA26 | Paralemmin A kinase anchor protein (Fragment), GN=Pakap                                | 1.07 | 0.86 | 0.80 | 1  | 136.76 |
| Q68FL4 | SAHH3  | Putative adenosylhomocysteinase 3, GN=Ahcyl2                                           | 1.06 | 0.85 | 0.80 | 4  | 226.66 |
| F8WGT1 | F8WGT1 | Adenosylhomocysteinase, GN=Ahcyl2                                                      | 1.06 | 0.85 | 0.80 | 4  | 226.66 |
| Q8CDG3 | VCIP1  | Deubiquitinating protein VCIP135, GN=Vcpip1                                            | 1.21 | 0.97 | 0.80 | 3  | 105.33 |
| Q3UH60 | DIP2B  | Disco-interacting protein 2 homolog B, GN=Dip2b                                        | 1.25 | 1    | 0.80 | 2  | 157.17 |
| P61961 | UFM1   | Ubiquitin-fold modifier 1, GN=Ufm1                                                     | 1.15 | 0.92 | 0.80 | 2  | 140.26 |
| Q3UGY8 | BIG3   | Brefeldin A-inhibited guanine nucleotide-exchange protein 3, GN=Arfgef3                | 0.95 | 0.76 | 0.80 | 1  | 52.17  |
| P60202 | MYPR   | Myelin proteolipid protein, GN=Plp1                                                    | 1.33 | 1.06 | 0.80 | 18 | 258.66 |
| Q6ZWZ6 | Q6ZWZ6 | 40S ribosomal protein S12, GN=Rps12                                                    | 1.18 | 0.94 | 0.80 | 4  | 128.21 |
| Q61941 | NNTM   | NAD(P) transhydrogenase mitochondrial, GN=Nnt                                          | 1.67 | 1.33 | 0.80 | 6  | 162.78 |
| Q4JIM5 | ABL2   | Abelson tyrosine-protein kinase 2, GN=Abl2                                             | 1.08 | 0.86 | 0.80 | 2  | 78.37  |
| A2CES4 | A2CES4 | U2 small nuclear ribonucleoprotein B" (Fragment), GN=Snrpb2                            | 0.97 | 0.77 | 0.79 | 1  | 43.8   |
| Q99KP3 | CRYL1  | Lambda-crystallin homolog, GN=Cryl1                                                    | 1.35 | 1.07 | 0.79 | 1  | 111.55 |
| Q9JK42 | PDK2   | [Pyruvate dehydrogenase (acetyl-transferring)] kinase isozyme 2 mitochondrial, GN=Pdk2 | 1.25 | 0.99 | 0.79 | 2  | 114.5  |
| Q9EPK7 | XPO7   | Exportin-7, GN=Xpo7                                                                    | 1.24 | 0.98 | 0.79 | 2  | 169.57 |

|            |            |                                                                       |      |      |      |   |        |
|------------|------------|-----------------------------------------------------------------------|------|------|------|---|--------|
| Q8BYP3     | RHOF       | Rho-related GTP-binding protein RhoF,<br>GN=Rhof                      | 0.98 | 0.77 | 0.79 | 1 | 82.84  |
| P43274     | H14        | Histone H1.4, GN=Hist1h1e                                             | 0.88 | 0.69 | 0.78 | 1 | 144.7  |
| P30999     | CTND1      | Catenin delta-1, GN=Ctnnd1                                            | 1.11 | 0.87 | 0.78 | 2 | 129.83 |
| A2A3W1     | A2A3W1     | Septin-6 (Fragment), GN=Sept6                                         | 1.06 | 0.83 | 0.78 | 1 | 180.86 |
| Q91Y97     | ALDOB      | Fructose-bisphosphate aldolase B,<br>GN=Aldob                         | 1.15 | 0.9  | 0.78 | 1 | 86.3   |
| P62313     | LSM6       | U6 snRNA-associated Sm-like protein<br>LSm6, GN=Lsm6                  | 0.78 | 0.61 | 0.78 | 1 | 51.97  |
| F8VQ05     | F8VQ05     | FRY-like transcription coactivator, GN=Fryl                           | 0.99 | 0.77 | 0.78 | 1 | 35.43  |
| Q9CXT8     | MPPB       | Mitochondrial-processing peptidase subunit<br>beta, GN=Pmpcb          | 1.8  | 1.4  | 0.78 | 1 | 75.23  |
| P26339     | CMGA       | Chromogranin-A, GN=Chga                                               | 1.12 | 0.86 | 0.77 | 1 | 108.78 |
| P29416     | HEXA       | Beta-hexosaminidase subunit alpha,<br>GN=Hexa                         | 1.12 | 0.86 | 0.77 | 2 | 119.68 |
| Q3UX10     | TBAL3      | Tubulin alpha chain-like 3, GN=Tubal3                                 | 1.92 | 1.47 | 0.77 | 1 | 168.89 |
| Q921M3     | SF3B3      | Splicing factor 3B subunit 3, GN=Sf3b3                                | 1.19 | 0.91 | 0.76 | 5 | 107.65 |
| Q91VM3     | WIPI4      | WD repeat domain phosphoinositide-<br>interacting protein 4, GN=Wdr45 | 1.55 | 1.17 | 0.75 | 1 | 37.16  |
| A0A140LJ36 | A0A140LJ36 | PRA1 family protein, GN=Gm45208                                       | 1.55 | 1.17 | 0.75 | 1 | 37.16  |
| Q8VH51     | RBM39      | RNA-binding protein 39, GN=Rbm39                                      | 1.09 | 0.82 | 0.75 | 2 | 122.69 |
| P04919     | B3AT       | Band 3 anion transport protein, GN=Slc4a1                             | 1.03 | 0.77 | 0.75 | 1 | 65.68  |

|            |            |                                                                                             |      |      |      |   |        |
|------------|------------|---------------------------------------------------------------------------------------------|------|------|------|---|--------|
| D3YXB7     | D3YXB7     | Paraplegin, GN=Spg7                                                                         | 0.98 | 0.73 | 0.74 | 1 | 51.53  |
| Q60738     | ZNT1       | Zinc transporter 1, GN=Slc30a1                                                              | 0.82 | 0.61 | 0.74 | 1 | 75.79  |
| Q9D6P8     | CALL3      | Calmodulin-like protein 3, GN=Calml3                                                        | 1.44 | 1.07 | 0.74 | 1 | 168.04 |
| Q8BH88     | DEP1B      | DEP domain-containing protein 1B,<br>GN=Depdc1b                                             | 1.24 | 0.92 | 0.74 | 1 | 16.16  |
| Q60749     | KHDR1      | KH domain-containing RNA-binding<br>signal transduction-associated protein 1,<br>GN=Khdrbs1 | 1.31 | 0.97 | 0.74 | 1 | 93.12  |
| P62806     | H4         | Histone H4, GN=Hist1h4a                                                                     | 0.8  | 0.59 | 0.74 | 9 | 181.49 |
| P28867     | KPCD       | Protein kinase C delta type, GN=Prkcd                                                       | 1.39 | 1.02 | 0.73 | 1 | 79.34  |
| Q6NVE9     | PPTC7      | Protein phosphatase PTC7 homolog,<br>GN=Pptc7                                               | 1.16 | 0.85 | 0.73 | 1 | 88.49  |
| A0A087WP80 | A0A087WP80 | Limbic system-associated membrane<br>protein, GN=Lsamp                                      | 1.01 | 0.74 | 0.73 | 1 | 210.69 |
| Q9D1H7     | GET4       | Golgi to ER traffic protein 4 homolog,<br>GN=Get4                                           | 1.21 | 0.88 | 0.73 | 1 | 84.3   |
| Q8BUK6     | HOOK3      | Protein Hook homolog 3, GN=Hook3                                                            | 0.69 | 0.5  | 0.72 | 3 | 96.56  |
| P46662     | MERL       | Merlin, GN=Nf2                                                                              | 0.98 | 0.71 | 0.72 | 1 | 55.06  |
| Q8K4Z5     | SF3A1      | Splicing factor 3A subunit 1, GN=Sf3a1                                                      | 1.2  | 0.86 | 0.72 | 1 | 50.56  |
| Q99JB2     | STML2      | Stomatin-like protein 2 mitochondrial,<br>GN=Stoml2                                         | 1.57 | 1.12 | 0.71 | 4 | 173.65 |
| Q8BZA9     | TIGAR      | Fructose-2 6-bisphosphatase TIGAR,<br>GN=Tigar                                              | 0.97 | 0.69 | 0.71 | 1 | 53.9   |

|            |            |                                                                                                  |      |      |      |   |        |
|------------|------------|--------------------------------------------------------------------------------------------------|------|------|------|---|--------|
| A0A0N4SVV8 | A0A0N4SVV8 | L-lactate dehydrogenase (Fragment),<br>GN=Ldhb                                                   | 1.86 | 1.31 | 0.70 | 1 | 171.63 |
| P07309     | TTHY       | Transthyretin, GN=Ttr                                                                            | 1.04 | 0.73 | 0.70 | 3 | 136.58 |
| Q8R086     | SUOX       | Sulfite oxidase mitochondrial, GN=Suox                                                           | 0.91 | 0.63 | 0.69 | 1 | 92.73  |
| Q9CQW2     | ARL8B      | ADP-ribosylation factor-like protein 8B,<br>GN=Arl8b                                             | 1.35 | 0.93 | 0.69 | 1 | 168.84 |
| O88879     | APAF       | Apoptotic protease-activating factor 1,<br>GN=Apaf1                                              | 1.06 | 0.73 | 0.69 | 1 | 33.13  |
| G3X8U3     | G3X8U3     | MCG6895, GN=2210016F16Rik                                                                        | 1.21 | 0.83 | 0.69 | 1 | 63.69  |
| A0A0J9YVH8 | A0A0J9YVH8 | Ras/Rap GTPase-activating protein SynGAP<br>(Fragment), GN=Syngap1                               | 1.52 | 1.04 | 0.68 | 1 | 323.37 |
| H3BJM7     | H3BJM7     | Arf-GAP with SH3 domain ANK repeat<br>and PH domain-containing protein 1<br>(Fragment), GN=Asap1 | 1.46 | 0.98 | 0.67 | 1 | 70.88  |
| E9PVS5     | E9PVS5     | MICoscomplex subunit MIC60 (Fragment),<br>GN=Immt                                                | 1.5  | 0.99 | 0.66 | 1 | 193.01 |
| F7ASU3     | F7ASU3     | Mitochondrial Rho GTPase 1 (Fragment),<br>GN=Rhot1                                               | 0.91 | 0.6  | 0.66 | 1 | 87.14  |
| Q99LE6     | ABCF2      | ATP-binding cassette sub-family F member<br>2, GN=Abcf2                                          | 1.37 | 0.9  | 0.66 | 1 | 41.14  |
| E9PWE4     | E9PWE4     | Transcription factor E2-alpha, GN=Tcf3                                                           | 0.96 | 0.63 | 0.66 | 1 | 19.66  |
| H3BJQ8     | H3BJQ8     | Glypican-5, GN=Gpc5                                                                              | 1.21 | 0.79 | 0.65 | 1 | 22.79  |
| A8DUK4     | A8DUK4     | Beta-globin, GN=Hbht1                                                                            | 0.53 | 0.34 | 0.64 | 3 | 259.2  |
| Q8CG72     | ARHL2      | Poly(ADP-ribose) glycohydrolase ARH3,<br>GN=Adprhl2                                              | 1.47 | 0.93 | 0.63 | 1 | 43.86  |



|            |            |                                                                        |      |      |      |   |        |
|------------|------------|------------------------------------------------------------------------|------|------|------|---|--------|
| B2RXC1     | TPC11      | Trafficking protein particle complex subunit 11, GN=Trappc11           | 1.48 | 0.92 | 0.62 | 1 | 80.57  |
| P11679     | K2C8       | Keratin type II cytoskeletal 8, GN=Krt8                                | 1.08 | 0.67 | 0.62 | 1 | 90.97  |
| P43277     | H13        | Histone H1.3, GN=Hist1h1d                                              | 0.96 | 0.59 | 0.61 | 1 | 137.12 |
| Q8BVG4     | DPP9       | Dipeptidyl peptidase 9, GN=Dpp9                                        | 1.64 | 0.98 | 0.60 | 1 | 72.07  |
| A0A0R4J0U2 | A0A0R4J0U2 | Serine/threonine-protein phosphatase 4 regulatory subunit 2, GN=Ppp4r2 | 1.72 | 1.02 | 0.59 | 1 | 79.87  |
| P28028     | BRAF       | Serine/threonine-protein kinase B-raf, GN=Braf                         | 1.73 | 1.02 | 0.59 | 1 | 161.84 |
| P48024     | EIF1       | Eukaryotic translation initiation factor 1, GN=Eif1                    | 1.51 | 0.89 | 0.59 | 1 | 128.93 |
| Q19AB2     | Q19AB2     | ROBO2 isoform b, GN=Robo2                                              | 1.19 | 0.7  | 0.59 | 1 | 49.02  |
| Q8BTM8     | FLNA       | Filamin-A, GN=Flna                                                     | 1.6  | 0.91 | 0.57 | 6 | 140.42 |
| E9Q9N6     | E9Q9N6     | Non-specific serine/threonine protein kinase, GN=Mark2                 | 1.53 | 0.67 | 0.44 | 1 | 143.16 |

---

**Table S-2. The 40 proteins in the hippocampus that were changed significantly by memantine treatment.**

**Table S-2. The 40 proteins in the hippocampus that were changed significantly by memantine treatment.** These proteins have met the criteria, the ratio of memantine / AD in expression levels of at least 1.5-fold ( up-regulation ) or at least <0.67-fold (down-regulation) as defined in the experimental procedures.

| Accession | Protein name | Description                                                                | Ratio |              |              | Unique | -10lgP |
|-----------|--------------|----------------------------------------------------------------------------|-------|--------------|--------------|--------|--------|
|           |              |                                                                            | AD/WT | Memantine/WT | Memantine/AD |        |        |
| P48725    | PCNT         | Pericentrin,GN=Pcnt                                                        | 0.79  | 2.83         | 3.58         | 1      | 66.89  |
| Q5SX46    | Q5SX46       | Mitochondrial 2-oxoglutarate/malate carrier protein (Fragment),GN=Slc25a11 | 1.48  | 4.12         | 2.78         | 1      | 200.12 |
| E9QM77    | E9QM77       | Ataxin-2,GN=Atxn2                                                          | 0.65  | 1.54         | 2.37         | 1      | 55.46  |
| E9Q555    | RN213        | E3 ubiquitin-protein ligase RNF213,GN=Rnf213                               | 0.8   | 1.88         | 2.35         | 1      | 65.4   |
| P29387    | GBB4         | Guanine nucleotide-binding protein subunit beta-4,GN=Gnb4                  | 1.15  | 2.62         | 2.28         | 2      | 172.11 |
| Q5SGK3    | AOXB         | Aldehyde oxidase 2,GN=Aox2                                                 | 1.53  | 3.36         | 2.20         | 1      | 19.72  |
| Q80WM5    | HPLN3        | Hyaluronan and proteoglycan link protein 3,GN=Hapln3                       | 0.9   | 1.97         | 2.19         | 1      | 97.78  |
| Q9Z0J1    | RECK         | Reversion-inducing cysteine-rich protein with Kazal motifs,GN=Reck         | 1.1   | 2.19         | 1.99         | 1      | 20.71  |
| P83510    | TNIK         | Traf2 and NCK-interacting protein kinase,GN=Tnik                           | 1.26  | 2.49         | 1.98         | 2      | 173.49 |

|            |            |                                                                         |      |      |      |   |        |
|------------|------------|-------------------------------------------------------------------------|------|------|------|---|--------|
| Q9ERB0     | SNP29      | Synaptosomal-associated protein 29,GN=Snap29                            | 0.89 | 1.75 | 1.97 | 3 | 91.63  |
| Q9D1X0     | NOL3       | Nucleolar protein 3,GN=Nol3                                             | 0.79 | 1.41 | 1.78 | 2 | 109.74 |
| Q8BGJ9     | U2AF4      | Splicing factor U2AF 26 kDa subunit,GN=U2af114                          | 0.62 | 1.03 | 1.66 | 1 | 38.17  |
| Q9D883     | U2AF1      | Splicing factor U2AF 35 kDa subunit,GN=U2af1                            | 0.62 | 1.03 | 1.66 | 1 | 38.17  |
| Q99JH7     | CSTN3      | Calsyntenin-3,GN=Clstn3                                                 | 0.73 | 1.18 | 1.62 | 1 | 20.68  |
| Q5HZI2     | C2C4C      | C2 calcium-dependent domain-containing protein 4C,GN=C2cd4cC2CD4 family | 0.83 | 1.3  | 1.57 | 1 | 44.94  |
| P56371     | RAB4A      | Ras-related protein Rab-4A,GN=Rab4a                                     | 1.15 | 1.78 | 1.55 | 1 | 115.33 |
| P20065     | TYB4       | Thymosin beta-4,GN=Tmsb4x                                               | 1.14 | 1.75 | 1.54 | 4 | 134.25 |
| A2ARZ7     | A2ARZ7     | RAB22A member RAS oncogene family isoform CRA_c,GN=Rab22a               | 0.98 | 1.5  | 1.53 | 2 | 89.67  |
| Q9JMD0     | ZN207      | BUB3-interacting and GLEBS motif-containing protein ZNF207,GN=Znf207    | 0.79 | 1.2  | 1.52 | 1 | 71.53  |
| A0A0J9YUM2 | A0A0J9YUM2 | Ras/Rap GTPase-activating protein SynGAP (Fragment),GN=Syngap1          | 1.41 | 2.14 | 1.52 | 1 | 323.14 |
| Q9Z2H2     | RGS6       | Regulator of G-protein signaling 6,GN=Rgs6                              | 0.99 | 1.5  | 1.52 | 3 | 112.67 |
| A0A0A6YW90 | A0A0A6YW90 | Glutamate receptor 2,GN=Gria2                                           | 0.8  | 1.21 | 1.51 | 1 | 269.66 |
| Q6NVD9     | BFSP2      | Phakinin,GN=Bfsp2                                                       | 0.92 | 1.39 | 1.51 | 1 | 19.64  |

|        |        |                                                                |      |      |      |   |        |
|--------|--------|----------------------------------------------------------------|------|------|------|---|--------|
| E9PVS5 | E9PVS5 | MICOS complex subunit MIC60<br>(Fragment),GN=Immt              | 1.5  | 0.99 | 0.66 | 1 | 193.01 |
| F7ASU3 | F7ASU3 | Mitochondrial Rho GTPase 1<br>(Fragment),GN=Rhot1              | 0.91 | 0.6  | 0.66 | 1 | 87.14  |
| Q99LE6 | ABCF2  | ATP-binding cassette sub-family F<br>member 2,GN=Abcf2         | 1.37 | 0.9  | 0.66 | 1 | 41.14  |
| E9PWE4 | E9PWE4 | Transcription factor E2-<br>alpha,GN=Tcf3                      | 0.96 | 0.63 | 0.66 | 1 | 19.66  |
| H3BJQ8 | H3BJQ8 | Glypican-5,GN=Gpc5                                             | 1.21 | 0.79 | 0.65 | 1 | 22.79  |
| A8DUK4 | A8DUK4 | Beta-globin,GN=Hbht1                                           | 0.53 | 0.34 | 0.64 | 3 | 259.2  |
| Q8CG72 | ARHL2  | Poly(ADP-ribose) glycohydrolase<br>ARH3,GN=Adprhl2             | 1.47 | 0.93 | 0.63 | 1 | 43.86  |
| B2RXC1 | TPC11  | Trafficking protein particle complex<br>subunit 11,GN=Trappc11 | 1.48 | 0.92 | 0.62 | 1 | 80.57  |
| P11679 | K2C8   | Keratin type II cytoskeletal<br>8,GN=Krt8                      | 1.08 | 0.67 | 0.62 | 1 | 90.97  |
| P43277 | H13    | Histone H1.3,GN=Hist1h1d                                       | 0.96 | 0.59 | 0.61 | 1 | 137.12 |
| Q8BVG4 | DPP9   | Dipeptidyl peptidase 9,GN=Dpp9                                 | 1.64 | 0.98 | 0.60 | 1 | 72.07  |

|            |            |                                                                          |      |      |      |   |        |
|------------|------------|--------------------------------------------------------------------------|------|------|------|---|--------|
| A0A0R4J0U2 | A0A0R4J0U2 | Serine/threonine-protein phosphatase<br>4 regulatory subunit 2,GN=Ppp4r2 | 1.72 | 1.02 | 0.59 | 1 | 79.87  |
| P28028     | BRAF       | Serine/threonine-protein kinase B-<br>raf,GN=Braf                        | 1.73 | 1.02 | 0.59 | 1 | 161.84 |
| P48024     | EIF1       | Eukaryotic translation initiation factor<br>1,GN=Eif1                    | 1.51 | 0.89 | 0.59 | 1 | 128.93 |
| Q19AB2     | Q19AB2     | ROBO2 isoform b,GN=Robo2                                                 | 1.19 | 0.7  | 0.59 | 1 | 49.02  |
| Q8BTM8     | FLNA       | Filamin-A,GN=Flna                                                        | 1.6  | 0.91 | 0.57 | 6 | 140.42 |
| E9Q9N6     | E9Q9N6     | Non-specific serine/threonine protein<br>kinase,GN=Mark2                 | 1.53 | 0.67 | 0.44 | 1 | 143.16 |

---

**Table S-3. 342 proteins in the cerebral cortex that were significantly changed by memantine treatment.**

**Table S-3. 342 proteins in the cerebral cortex that were significantly changed by memantine treatment.** These proteins have met the criteria, the ratio of memantine / AD in expression levels of at least 1.2-fold ( up-regulation ) or at least <0.83-fold (down-regulation) as defined in the experimental procedures.

| Accession | Protein name | Description                                                                | Ratio |              |              | Unique | -10lgP |
|-----------|--------------|----------------------------------------------------------------------------|-------|--------------|--------------|--------|--------|
|           |              |                                                                            | AD/WT | Memantine/WT | Memantine/AD |        |        |
| Q9CXT8    | MPPB         | Mitochondrial-processing peptidase subunit beta, GN=Pmpcb                  | 0.98  | 2.64         | 2.69         | 1      | 89.76  |
| P48725    | PCNT         | Pericentrin, GN=Pcnt                                                       | 0.93  | 2.44         | 2.62         | 1      | 83.85  |
| Q91X96    | MSS4         | Guanine nucleotide exchange factor MSS4, GN=Rabif                          | 0.92  | 1.95         | 2.12         | 1      | 38.67  |
| Q6X893    | CTL1         | Choline transporter-like protein 1, GN=Slc44a1                             | 0.66  | 1.36         | 2.06         | 1      | 154.36 |
| Q9CQB5    | CISD2        | CDGSH iron-sulfur domain-containing protein 2, GN=Cisd2                    | 1.05  | 2.07         | 1.97         | 1      | 64.37  |
| Q64010    | CRK          | Adapter molecule crk, GN=Crk                                               | 1.02  | 1.88         | 1.84         | 1      | 201.47 |
| P50153    | GBG4         | Guanine nucleotide-binding protein G(I)/G(S)/G(O) subunit gamma-4, GN=Gng4 | 0.73  | 1.33         | 1.82         | 2      | 111.86 |
| Q8C129    | LCAP         | Leucyl-cystinyl aminopeptidase, GN=Lnpep                                   | 0.48  | 0.84         | 1.75         | 1      | 82.37  |
| F6TYB7    | F6TYB7       | Myelin basic protein (Fragment), GN=Mbp                                    | 0.89  | 1.44         | 1.62         | 2      | 261.39 |
| Q3TDN2    | FAF2         | FAS-associated factor 2, GN=Faf2                                           | 0.9   | 1.43         | 1.59         | 1      | 117.52 |

|            |            |                                                                        |      |      |      |   |        |
|------------|------------|------------------------------------------------------------------------|------|------|------|---|--------|
| Q6PGB8     | SMCA1      | Probable global transcription activator<br>SNF2L1, GN=Smarca1          | 0.96 | 1.5  | 1.56 | 1 | 66.05  |
| P55258     | RAB8A      | Ras-related protein Rab-8A, GN=Rab8a                                   | 1.16 | 1.81 | 1.56 | 1 | 167.34 |
| P83870     | PHF5A      | PHD finger-like domain-containing<br>protein 5A, GN=Phf5a              | 0.38 | 0.59 | 1.55 | 1 | 72.42  |
| Q9D4H1     | EXOC2      | Exocyst complex component 2,<br>GN=Exoc2                               | 0.94 | 1.45 | 1.54 | 1 | 128.79 |
| B7ZCJ1     | B7ZCJ1     | Rho GTPase-activating protein 21,<br>GN=Arhgap21                       | 0.79 | 1.17 | 1.48 | 1 | 96.29  |
| A0A1W2P772 | A0A1W2P772 | Plasma membrane calcium-transporting<br>ATPase 1 (Fragment), GN=Atp2b1 | 0.55 | 0.81 | 1.47 | 1 | 191.19 |
| D3Z0L4     | D3Z0L4     | MICOS complex subunit (Fragment),<br>GN=Chchd3                         | 0.89 | 1.31 | 1.47 | 1 | 128.02 |
| Q80UU9     | PGRC2      | Membrane-associated progesterone<br>receptor component 2, GN=Pgrmc2    | 0.73 | 1.06 | 1.45 | 1 | 109.61 |
| O08677     | KNG1       | Kininogen-1, GN=Kng1                                                   | 0.68 | 0.97 | 1.43 | 1 | 86.71  |
| Q80UP3     | DGKZ       | Diacylglycerol kinase zeta, GN=Dgkz                                    | 1.04 | 1.48 | 1.42 | 2 | 127.01 |
| Q03137     | EPHA4      | Ephrin type-A receptor 4, GN=Epha4                                     | 0.8  | 1.13 | 1.41 | 3 | 164.12 |
| Q9D7X3     | DUS3       | Dual specificity protein phosphatase 3,<br>GN=Dusp3                    | 0.8  | 1.12 | 1.40 | 1 | 166.98 |
| Q9D9V3     | ECHD1      | Ethylmalonyl-CoA decarboxylase,<br>GN=Echdc1                           | 1.17 | 1.61 | 1.38 | 1 | 145.5  |
| Q91ZR1     | RAB4B      | Ras-related protein Rab-4B, GN=Rab4b                                   | 0.83 | 1.14 | 1.37 | 1 | 175.74 |
| P61087     | UBE2K      | Ubiquitin-conjugating enzyme E2 K,<br>GN=Ube2k                         | 0.89 | 1.21 | 1.36 | 2 | 154.29 |

|            |            |                                                                           |      |      |      |   |        |
|------------|------------|---------------------------------------------------------------------------|------|------|------|---|--------|
| P28741     | KIF3A      | Kinesin-like protein KIF3A, GN=Kif3a                                      | 0.81 | 1.1  | 1.36 | 3 | 142    |
| A0A140LIJ4 | A0A140LIJ4 | Dynein axonemal heavy chain 14, GN=Dnah14                                 | 0.96 | 1.3  | 1.35 | 1 | 81.01  |
| Q3UHB8     | CC177      | Coiled-coil domain-containing protein 177, GN=Ccdc177                     | 1.02 | 1.38 | 1.35 | 2 | 159.9  |
| Q9DB25     | ALG5       | Dolichyl-phosphate beta-glucosyltransferase, GN=Alg5                      | 0.71 | 0.96 | 1.35 | 1 | 49.53  |
| Q9D8B4     | NDUAB      | NADH dehydrogenase [ubiquinone] 1 alpha subcomplex subunit 11, GN=Ndufa11 | 0.69 | 0.93 | 1.35 | 1 | 102.34 |
| Q9DBS5     | KLC4       | Kinesin light chain 4, GN=Klc4                                            | 0.77 | 1.03 | 1.34 | 1 | 136.81 |
| Q9CQC9     | SAR1B      | GTP-binding protein SAR1b, GN=Sar1b                                       | 0.75 | 1    | 1.33 | 1 | 143.58 |
| F8WID5     | F8WID5     | Tropomyosin alpha-1 chain, GN=Tpm1                                        | 0.92 | 1.22 | 1.33 | 1 | 164.54 |
| Q9EQF5     | DPYS       | Dihydropyrimidinase, GN=Dpys                                              | 0.71 | 0.94 | 1.32 | 1 | 47.12  |
| S4R1C4     | S4R1C4     | Calcium-transporting ATPase, GN=Atp2b2                                    | 0.85 | 1.12 | 1.32 | 1 | 331.6  |
| Q9CRC8     | LRC40      | Leucine-rich repeat-containing protein 40, GN=Lrrc40                      | 0.92 | 1.21 | 1.32 | 1 | 116.9  |
| F6V2U0     | F6V2U0     | Type I inositol 3 4-bisphosphate 4-phosphatase, GN=Inpp4a                 | 0.7  | 0.91 | 1.30 | 1 | 186.05 |
| O70250     | PGAM2      | Phosphoglycerate mutase 2, GN=Pgam2                                       | 1.2  | 1.55 | 1.29 | 1 | 152.71 |
| Q9D662     | SC23B      | Protein transport protein Sec23B, GN=Sec23b                               | 0.79 | 1.02 | 1.29 | 1 | 100.6  |
| P16858     | G3P        | Glyceraldehyde-3-phosphate dehydrogenase, GN=Gapdh                        | 0.83 | 1.07 | 1.29 | 4 | 368.99 |



|        |        |                                                       |      |      |      |    |        |
|--------|--------|-------------------------------------------------------|------|------|------|----|--------|
| Q7TNC4 | LC7L2  | Putative RNA-binding protein Luc7-like 2, GN=Luc7l2   | 0.92 | 1.18 | 1.28 | 1  | 132.05 |
| Q9WTQ5 | AKA12  | A-kinase anchor protein 12, GN=Akap12                 | 0.71 | 0.91 | 1.28 | 4  | 175.44 |
| Q9WUT3 | KS6A2  | Ribosomal protein S6 kinase alpha-2, GN=Rps6ka2       | 0.82 | 1.05 | 1.28 | 2  | 90.79  |
| Q9CTY5 | MICU3  | Calcium uptake protein 3 mitochondrial, GN=Micu3      | 0.87 | 1.11 | 1.28 | 1  | 86.62  |
| Q9Z2W0 | DNPEP  | Aspartyl aminopeptidase, GN=Dnpep                     | 0.84 | 1.07 | 1.27 | 3  | 162.68 |
| Q9WUC3 | LY6H   | Lymphocyte antigen 6H, GN=Ly6h                        | 1.05 | 1.33 | 1.27 | 2  | 123.58 |
| F6RT34 | F6RT34 | Myelin basic protein (Fragment), GN=Mbp               | 1.07 | 1.35 | 1.26 | 3  | 280.79 |
| O54946 | DNJB6  | DnaJ homolog subfamily B member 6, GN=Dnajb6          | 1.04 | 1.31 | 1.26 | 1  | 71.86  |
| Q921Q7 | RIN1   | Ras and Rab interactor 1, GN=Rin1                     | 0.85 | 1.07 | 1.26 | 2  | 72.47  |
| A2A7S7 | A2A7S7 | Tyrosine--tRNA ligase, GN=Yars                        | 1.05 | 1.32 | 1.26 | 1  | 206.01 |
| Q5NCX5 | NEUL4  | Neuralized-like protein 4, GN=Neur14                  | 0.98 | 1.23 | 1.26 | 1  | 33.24  |
| Q61074 | PPM1G  | Protein phosphatase 1G, GN=Ppm1g                      | 0.95 | 1.19 | 1.25 | 2  | 146.75 |
| P23819 | GRIA2  | Glutamate receptor 2, GN=Gria2                        | 0.93 | 1.16 | 1.25 | 1  | 279.26 |
| P03995 | GFAP   | Glial fibrillary acidic protein, GN=Gfap              | 0.85 | 1.06 | 1.25 | 18 | 266.3  |
| Q80WM4 | HPLN4  | Hyaluronan and proteoglycan link protein 4, GN=Hapln4 | 0.99 | 1.23 | 1.24 | 1  | 95.84  |

|            |            |                                                                                |      |      |      |   |        |
|------------|------------|--------------------------------------------------------------------------------|------|------|------|---|--------|
| Q8C754     | VPS52      | Vacuolar protein sorting-associated protein 52 homolog, GN=Vps52               | 0.92 | 1.14 | 1.24 | 2 | 66.35  |
| Q9JIF0     | ANM1       | Protein arginine N-methyltransferase 1, GN=Prmt1                               | 0.84 | 1.04 | 1.24 | 2 | 107.33 |
| P80560     | PTPR2      | Receptor-type tyrosine-protein phosphatase N2, GN=Ptpn2                        | 0.97 | 1.2  | 1.24 | 4 | 168.92 |
| Q8VEJ9     | VPS4A      | Vacuolar protein sorting-associated protein 4A, GN=Vps4a                       | 0.94 | 1.16 | 1.23 | 2 | 97.96  |
| E9Q7Q3     | E9Q7Q3     | Tropomyosin alpha-3 chain, GN=Tpm3                                             | 0.94 | 1.16 | 1.23 | 1 | 211.99 |
| E9PZ16     | E9PZ16     | Basement membrane-specific heparan sulfate proteoglycan core protein, GN=Hspg2 | 0.99 | 1.22 | 1.23 | 3 | 204.42 |
| Q9QXK3     | COPG2      | Coatomer subunit gamma-2, GN=Copg2                                             | 0.82 | 1.01 | 1.23 | 1 | 105.49 |
| A0A0N4SVT8 | A0A0N4SVT8 | DnaJ homolog subfamily B member 8 (Fragment), GN=Dnajb8                        | 0.96 | 1.18 | 1.23 | 1 | 26.6   |
| Q3UYG8     | MACD2      | O-acetyl-ADP-ribose deacetylase MACROD2, GN=Macrod2                            | 1.02 | 1.25 | 1.23 | 1 | 109.24 |
| P61961     | UFM1       | Ubiquitin-fold modifier 1, GN=Ufm1                                             | 1.03 | 1.26 | 1.22 | 2 | 69.67  |
| P23927     | CRYAB      | Alpha-crystallin B chain, GN=Cryab                                             | 2.54 | 3.1  | 1.22 | 3 | 123.06 |
| Q60790     | RASA3      | Ras GTPase-activating protein 3, GN=Rasa3                                      | 0.91 | 1.11 | 1.22 | 3 | 138.86 |
| Q8BFQ8     | GALD1      | Glutamine amidotransferase-like class 1 domain-containing protein 1, GN=Gatd1  | 0.97 | 1.18 | 1.22 | 1 | 120.51 |
| Q9JHG6     | RCAN1      | Calcipressin-1, GN=Rcan1                                                       | 0.93 | 1.13 | 1.22 | 1 | 70.88  |

|            |            |                                                                    |      |      |      |    |        |
|------------|------------|--------------------------------------------------------------------|------|------|------|----|--------|
| Q9JLR9     | HIG1A      | HIG1 domain family member 1A<br>mitochondrial, GN=Higd1a           | 0.7  | 0.85 | 1.21 | 1  | 24.56  |
| Q9QZB7     | ARP10      | Actin-related protein 10, GN=Actr10                                | 0.98 | 1.19 | 1.21 | 2  | 124.82 |
| A0A140LHX5 | A0A140LHX5 | Protein unc-13 homolog B,<br>GN=Unc13b                             | 1.03 | 1.25 | 1.21 | 1  | 109.9  |
| Q99LS3     | SERB       | Phosphoserine phosphatase, GN=PspH                                 | 0.67 | 0.81 | 1.21 | 1  | 74.65  |
| Q9WVK4     | EHD1       | EH domain-containing protein 1,<br>GN=Ehd1                         | 1.2  | 1.45 | 1.21 | 1  | 195.37 |
| Q9DCS3     | MECR       | Enoyl-[acyl-carrier-protein] reductase<br>mitochondrial, GN=Mecr   | 1.11 | 1.34 | 1.21 | 3  | 188.44 |
| Q8K4R4     | PITC1      | Cytoplasmic phosphatidylinositol<br>transfer protein 1, GN=Pitpnc1 | 0.97 | 1.17 | 1.21 | 3  | 140.07 |
| Q9D061     | ACBD6      | Acyl-CoA-binding domain-containing<br>protein 6, GN=Acbd6          | 0.97 | 1.17 | 1.21 | 2  | 140.28 |
| O08530     | S1PR1      | Sphingosine 1-phosphate receptor 1,<br>GN=S1pr1                    | 0.83 | 1    | 1.20 | 1  | 78.29  |
| P42208     | NEDD5      | Septin-2, GN=Sept2                                                 | 0.95 | 1.14 | 1.20 | 4  | 182.32 |
| Q9D906     | ATG7       | Ubiquitin-like modifier-activating<br>enzyme ATG7, GN=Atg7         | 0.85 | 1.02 | 1.20 | 1  | 120.49 |
| Q91Z67     | SRGP2      | SLIT-ROBO Rho GTPase-activating<br>protein 2, GN=Srgap2            | 1    | 0.83 | 0.83 | 3  | 130.37 |
| Q8K0D0     | CDK17      | Cyclin-dependent kinase 17,<br>GN=Cdk17                            | 1.29 | 1.07 | 0.83 | 1  | 125.94 |
| Q922B2     | SYDC       | Aspartate--tRNA ligase cytoplasmic,<br>GN=Dars                     | 1.23 | 1.02 | 0.83 | 12 | 186.61 |
| A2CG49     | KALRN      | Kalirin, GN=Kalrn                                                  | 1.17 | 0.97 | 0.83 | 1  | 142.35 |

|        |        |                                                      |      |      |      |    |        |
|--------|--------|------------------------------------------------------|------|------|------|----|--------|
| Q9DAW9 | CNN3   | Calponin-3, GN=Cnn3                                  | 1.17 | 0.97 | 0.83 | 1  | 131.59 |
| F6VQ81 | F6VQ81 | Tumor protein D54 (Fragment),<br>GN=Tpd52l2          | 1.11 | 0.92 | 0.83 | 3  | 147.89 |
| Q922F4 | TBB6   | Tubulin beta-6 chain, GN=Tubb6                       | 0.99 | 0.82 | 0.83 | 2  | 345.58 |
| P62270 | RS18   | 40S ribosomal protein S18, GN=Rps18                  | 1.22 | 1.01 | 0.83 | 4  | 122.19 |
| A2AEX6 | A2AEX6 | Four and a half LIM domains protein 1,<br>GN=Fhl1    | 1.16 | 0.96 | 0.83 | 4  | 163.43 |
| Q9CZR8 | EFTS   | Elongation factor Ts mitochondrial,<br>GN=Tsfm       | 1.1  | 0.91 | 0.83 | 1  | 139.78 |
| Q922Q4 | P5CR2  | Pyrroline-5-carboxylate reductase 2,<br>GN=Pycr2     | 1.27 | 1.05 | 0.83 | 1  | 112.58 |
| Q9CWE0 | MFR1L  | Mitochondrial fission regulator 1-like,<br>GN=Mtfr1l | 1.21 | 1    | 0.83 | 2  | 176.52 |
| P41216 | ACSL1  | Long-chain-fatty-acid--CoA ligase 1,<br>GN=Acsl1     | 1.38 | 1.14 | 0.83 | 8  | 157.07 |
| Q9EPL8 | IPO7   | Importin-7, GN=Ipo7                                  | 1.03 | 0.85 | 0.83 | 4  | 143.62 |
| O54901 | OX2G   | OX-2 membrane glycoprotein,<br>GN=Cd200              | 1.2  | 0.99 | 0.83 | 4  | 150.49 |
| Q8BH58 | TIPRL  | TIP41-like protein, GN=Tiprl                         | 1.08 | 0.89 | 0.82 | 4  | 138.21 |
| O88492 | PLIN4  | Perilipin-4, GN=Plin4                                | 1.25 | 1.03 | 0.82 | 1  | 47     |
| Q8BGH4 | REEP1  | Receptor expression-enhancing protein<br>1, GN=Reep1 | 1.25 | 1.03 | 0.82 | 2  | 126.61 |
| Q9ESW4 | AGK    | Acylglycerol kinase mitochondrial,<br>GN=Agk         | 1.19 | 0.98 | 0.82 | 11 | 229.63 |

|        |        |                                                                     |      |      |      |   |        |
|--------|--------|---------------------------------------------------------------------|------|------|------|---|--------|
| Q59J78 | MIMIT  | Mimitin mitochondrial, GN=Ndufaf2                                   | 0.79 | 0.65 | 0.82 | 2 | 88.23  |
| P14115 | RL27A  | 60S ribosomal protein L27a,<br>GN=Rpl27a                            | 1.29 | 1.06 | 0.82 | 5 | 131.95 |
| Q920E5 | FPPS   | Farnesyl pyrophosphate synthase,<br>GN=Fdps                         | 1.29 | 1.06 | 0.82 | 5 | 168.74 |
| P47802 | MTX1   | Metaxin-1, GN=Mtx1                                                  | 1.12 | 0.92 | 0.82 | 4 | 150.09 |
| P70663 | SPRL1  | SPARC-like protein 1, GN=Sparcl1                                    | 1.4  | 1.15 | 0.82 | 3 | 213.02 |
| Q8K0T7 | UN13C  | Protein unc-13 homolog C, GN=Unc13c                                 | 1.4  | 1.15 | 0.82 | 1 | 94.87  |
| Q8C6E0 | CFA36  | Cilia- and flagella-associated protein 36,<br>GN=Cfap36             | 1.23 | 1.01 | 0.82 | 1 | 131.4  |
| Q8CGK7 | GNAL   | Guanine nucleotide-binding protein<br>G(olf) subunit alpha, GN=Gnal | 1.23 | 1.01 | 0.82 | 2 | 186.61 |
| Q99KH8 | STK24  | Serine/threonine-protein kinase 24,<br>GN=Stk24                     | 1.23 | 1.01 | 0.82 | 3 | 168.92 |
| Q9CYR0 | SSBP   | Single-stranded DNA-binding protein<br>mitochondrial, GN=Ssbp1      | 1.23 | 1.01 | 0.82 | 2 | 102.39 |
| E9Q3M9 | E9Q3M9 | RIKEN cDNA 2010300C02 gene,<br>GN=2010300C02Rik                     | 1.23 | 1.01 | 0.82 | 2 | 180.25 |
| Q02248 | CTNB1  | Catenin beta-1, GN=Ctnnb1                                           | 0.95 | 0.78 | 0.82 | 1 | 230.08 |
| P26339 | CMGA   | Chromogranin-A, GN=Chga                                             | 1.06 | 0.87 | 0.82 | 1 | 101.94 |
| Q8VDQ1 | PTGR2  | Prostaglandin reductase 2, GN=Ptgr2                                 | 1.11 | 0.91 | 0.82 | 5 | 153.28 |
| O88543 | CSN3   | COP9 signalosome complex subunit 3,<br>GN=Cops3                     | 1.21 | 0.99 | 0.82 | 4 | 144.6  |

|            |            |                                                                                 |      |      |      |   |        |
|------------|------------|---------------------------------------------------------------------------------|------|------|------|---|--------|
| P62192     | PRS4       | 26S proteasome regulatory subunit 4,<br>GN=Psmc1                                | 1.21 | 0.99 | 0.82 | 8 | 205.76 |
| A0A1B0GT12 | A0A1B0GT12 | Small conductance calcium-activated<br>potassium channel protein 2,<br>GN=Kcnn2 | 0.99 | 0.81 | 0.82 | 1 | 49.03  |
| Q9D6S7     | RRFM       | Ribosome-recycling factor<br>mitochondrial, GN=Mrrf                             | 1.26 | 1.03 | 0.82 | 1 | 135.19 |
| Q8C166     | CPNE1      | Copine-1, GN=Cpne1                                                              | 1.15 | 0.94 | 0.82 | 2 | 104.7  |
| Q99JY8     | PLPP3      | Phospholipid phosphatase 3, GN=Plpp3                                            | 1.25 | 1.02 | 0.82 | 3 | 74.11  |
| Q8BHL3     | TB10B      | TBC1 domain family member 10B,<br>GN=Tbc1d10b                                   | 1.51 | 1.23 | 0.81 | 1 | 105.27 |
| P56395     | CYB5       | Cytochrome b5, GN=Cyb5a                                                         | 1.13 | 0.92 | 0.81 | 3 | 163.17 |
| Q91YH5     | ATLA3      | Atlastin-3, GN=Atl3                                                             | 1.34 | 1.09 | 0.81 | 1 | 100.48 |
| A2A8L5     | PTPRF      | Receptor-type tyrosine-protein<br>phosphatase F, GN=Ptpfrf                      | 1.07 | 0.87 | 0.81 | 2 | 159.56 |
| Q8CFE4     | SCYL2      | SCY1-like protein 2, GN=Scyl2                                                   | 1.07 | 0.87 | 0.81 | 2 | 112.42 |
| Q924N4     | S12A6      | Solute carrier family 12 member 6,<br>GN=Slc12a6                                | 1.12 | 0.91 | 0.81 | 1 | 132.66 |
| Q8C0C7     | SYFA       | Phenylalanine--tRNA ligase alpha<br>subunit, GN=Farsa                           | 1.17 | 0.95 | 0.81 | 6 | 170.04 |
| E9PY39     | E9PY39     | Uncharacterized protein, GN=Gm20431                                             | 1.54 | 1.25 | 0.81 | 1 | 181.48 |
| P08414     | KCC4       | Calcium/calmodulin-dependent protein<br>kinase type IV, GN=Camk4                | 1.27 | 1.03 | 0.81 | 3 | 166.17 |
| Q9WU84     | CCS        | Copper chaperone for superoxide<br>dismutase, GN=Ccs                            | 1.27 | 1.03 | 0.81 | 1 | 113.1  |

|        |       |                                                                                     |      |      |      |    |        |
|--------|-------|-------------------------------------------------------------------------------------|------|------|------|----|--------|
| Q9CR00 | PSMD9 | 26S proteasome non-ATPase regulatory subunit 9, GN=Psm9                             | 1.11 | 0.9  | 0.81 | 4  | 107.46 |
| Q9D1D4 | TMEDA | Transmembrane emp24 domain-containing protein 10, GN=Tmed10                         | 1.16 | 0.94 | 0.81 | 3  | 132.69 |
| Q9JII6 | AK1A1 | Alcohol dehydrogenase [NADP(+)], GN=Akr1a1                                          | 1.16 | 0.94 | 0.81 | 11 | 229.27 |
| E9Q7G0 | NUMA1 | Nuclear mitotic apparatus protein 1, GN=Numa1                                       | 1.15 | 0.93 | 0.81 | 3  | 143.87 |
| Q99JR1 | SFXN1 | Sideroflexin-1, GN=Sfxn1                                                            | 1.15 | 0.93 | 0.81 | 4  | 206.93 |
| Q60829 | PPR1B | Protein phosphatase 1 regulatory subunit 1B, GN=Ppp1r1b                             | 1.2  | 0.97 | 0.81 | 5  | 162.75 |
| Q9DCP2 | S38A3 | Sodium-coupled neutral amino acid transporter 3, GN=Slc38a3                         | 1.3  | 1.05 | 0.81 | 3  | 110.17 |
| Q9JKC6 | CEND  | Cell cycle exit and neuronal differentiation protein 1, GN=Cend1                    | 1.3  | 1.05 | 0.81 | 3  | 119.7  |
| Q64338 | PDE1C | Calcium/calmodulin-dependent 3' 5'-cyclic nucleotide phosphodiesterase 1C, GN=Pde1c | 1.35 | 1.09 | 0.81 | 1  | 81.26  |
| Q8R2Y0 | ABHD6 | Monoacylglycerol lipase ABHD6, GN=Abhd6                                             | 1.09 | 0.88 | 0.81 | 3  | 111.25 |
| Q99JT1 | GATB  | Glutamyl-tRNA(Gln) amidotransferase subunit B mitochondrial, GN=Gatb                | 1.14 | 0.92 | 0.81 | 1  | 59.3   |
| Q9CZR3 | TM40L | Mitochondrial import receptor subunit TOM40B, GN=Tomm40l                            | 0.88 | 0.71 | 0.81 | 1  | 86.58  |
| Q9Z268 | RASL1 | RasGAP-activating-like protein 1, GN=Rasal1                                         | 0.88 | 0.71 | 0.81 | 9  | 223.64 |
| Q8BJI1 | S6A17 | Sodium-dependent neutral amino acid transporter SLC6A17, GN=Slc6a17                 | 1.19 | 0.96 | 0.81 | 4  | 187.93 |

|        |       |                                                                                               |      |      |      |   |        |
|--------|-------|-----------------------------------------------------------------------------------------------|------|------|------|---|--------|
| Q922H2 | PDK3  | [Pyruvate dehydrogenase (acetyl-transferring)] kinase isozyme 3 mitochondrial, GN=Pdk3        | 1.24 | 1    | 0.81 | 4 | 165.42 |
| Q6P1F6 | 2ABA  | Serine/threonine-protein phosphatase 2A 55 kDa regulatory subunit B alpha isoform, GN=Ppp2r2a | 1.29 | 1.04 | 0.81 | 3 | 205.92 |
| Q05A62 | DNAL1 | Dynein light chain 1 axonemal, GN=Dnal1                                                       | 0.98 | 0.79 | 0.81 | 1 | 74.68  |
| Q9D6P8 | CALL3 | Calmodulin-like protein 3, GN=Calml3                                                          | 1.08 | 0.87 | 0.81 | 1 | 172.36 |
| Q14BI2 | GRM2  | Metabotropic glutamate receptor 2, GN=Grm2                                                    | 1.13 | 0.91 | 0.81 | 5 | 197.26 |
| Q8K097 | LFG2  | Protein lifeguard 2, GN=Faim2                                                                 | 1.23 | 0.99 | 0.80 | 1 | 70.68  |
| O08848 | RO60  | 60 kDa SS-A/Ro ribonucleoprotein, GN=Trove2                                                   | 1.22 | 0.98 | 0.80 | 1 | 116.3  |
| P16332 | MUTA  | Methylmalonyl-CoA mutase mitochondrial, GN=Mut                                                | 1.22 | 0.98 | 0.80 | 4 | 140.8  |
| Q9DC16 | ERGI1 | Endoplasmic reticulum-Golgi intermediate compartment protein 1, GN=Ergic1                     | 1.22 | 0.98 | 0.80 | 3 | 130.83 |
| Q03157 | APLP1 | Amyloid-like protein 1, GN=Aplp1                                                              | 1.16 | 0.93 | 0.80 | 1 | 133.65 |
| Q3UYC0 | PPM1H | Protein phosphatase 1H, GN=Ppm1h                                                              | 1.21 | 0.97 | 0.80 | 8 | 204.76 |
| Q64524 | H2B2E | Histone H2B type 2-E, GN=Hist2h2be                                                            | 1.26 | 1.01 | 0.80 | 1 | 168.34 |
| Q8BFU3 | RN214 | RING finger protein 214, GN=Rnf214                                                            | 1.36 | 1.09 | 0.80 | 4 | 180.9  |
| A2ASQ1 | AGRIN | Agrin, GN=Agrn                                                                                | 1    | 0.8  | 0.80 | 1 | 174.27 |



|        |        |                                                                          |      |      |      |   |        |
|--------|--------|--------------------------------------------------------------------------|------|------|------|---|--------|
| Q6P1B1 | XPP1   | Xaa-Pro aminopeptidase 1,<br>GN=Xpnpep1                                  | 1.2  | 0.96 | 0.80 | 5 | 170.71 |
| Q6P4T2 | U520   | U5 small nuclear ribonucleoprotein 200<br>kDa helicase, GN=Snrnp200      | 1.2  | 0.96 | 0.80 | 2 | 175.69 |
| A3KFU8 | A3KFU8 | Polyadenylate-binding protein,<br>GN=Pabpc4                              | 0.95 | 0.76 | 0.80 | 2 | 191.35 |
| Q3U214 | MAST3  | Microtubule-associated<br>serine/threonine-protein kinase 3,<br>GN=Mast3 | 1.19 | 0.95 | 0.80 | 1 | 98.21  |
| Q6PAJ1 | BCR    | Breakpoint cluster region protein,<br>GN=Bcr                             | 1.14 | 0.91 | 0.80 | 5 | 145.44 |
| O35609 | SCAM3  | Secretory carrier-associated membrane<br>protein 3, GN=Scamp3            | 1.13 | 0.9  | 0.80 | 1 | 126.87 |
| O88533 | DDC    | Aromatic-L-amino-acid decarboxylase,<br>GN=Ddc                           | 1.13 | 0.9  | 0.80 | 2 | 105.41 |
| P97352 | S10AD  | Protein S100-A13, GN=S100a13                                             | 1.13 | 0.9  | 0.80 | 4 | 130.59 |
| P28184 | MT3    | Metallothionein-3, GN=Mt3                                                | 1.62 | 1.29 | 0.80 | 1 | 65.93  |
| Q9JHK4 | PGTA   | Geranylgeranyl transferase type-2<br>subunit alpha, GN=Rabggta           | 1.08 | 0.86 | 0.80 | 5 | 186.6  |
| Q9ESN9 | JIP3   | C-Jun-amino-terminal kinase-<br>interacting protein 3, GN=Mapk8ip3       | 1.47 | 1.17 | 0.80 | 2 | 150.61 |
| Q8C181 | MBNL2  | Muscleblind-like protein 2, GN=Mbnl2                                     | 1.02 | 0.81 | 0.79 | 2 | 74.31  |
| Q5F2E8 | TAOK1  | Serine/threonine-protein kinase TAO1,<br>GN=Taok1                        | 0.92 | 0.73 | 0.79 | 1 | 117.08 |
| O70172 | PI42A  | Phosphatidylinositol 5-phosphate 4-<br>kinase type-2 alpha, GN=Pip4k2a   | 1.16 | 0.92 | 0.79 | 2 | 186.43 |
| E9Q2W9 | E9Q2W9 | Alpha-actinin-4 (Fragment), GN=Actn4                                     | 1.16 | 0.92 | 0.79 | 1 | 274.78 |

|        |        |                                                                  |      |      |      |    |        |
|--------|--------|------------------------------------------------------------------|------|------|------|----|--------|
| Q8BR63 | F177A  | Protein FAM177A1, GN=Fam177a1                                    | 1.74 | 1.38 | 0.79 | 1  | 114.22 |
| Q3UVL4 | VPS51  | Vacuolar protein sorting-associated protein 51 homolog, GN=Vps51 | 1.11 | 0.88 | 0.79 | 3  | 133.3  |
| Q99L13 | 3HIDH  | 3-hydroxyisobutyrate dehydrogenase mitochondrial, GN=Hibadh      | 1.35 | 1.07 | 0.79 | 4  | 182.05 |
| P46471 | PRS7   | 26S proteasome regulatory subunit 7, GN=Psmc2                    | 1.2  | 0.95 | 0.79 | 11 | 210.98 |
| A6H5Z3 | EXC6B  | Exocyst complex component 6B, GN=Exoc6b                          | 1.53 | 1.21 | 0.79 | 1  | 116.3  |
| Q64288 | OMP    | Olfactory marker protein, GN=Omp                                 | 1.29 | 1.02 | 0.79 | 4  | 160.44 |
| P70206 | PLXA1  | Plexin-A1, GN=Plxna1                                             | 1.48 | 1.17 | 0.79 | 1  | 168.53 |
| Q921M3 | SF3B3  | Splicing factor 3B subunit 3, GN=Sf3b3                           | 1.24 | 0.98 | 0.79 | 4  | 154.78 |
| Q8C729 | F126B  | Protein FAM126B, GN=Fam126b                                      | 1.14 | 0.9  | 0.79 | 3  | 149.8  |
| Q9JHR7 | IDE    | Insulin-degrading enzyme, GN=Ide                                 | 0.95 | 0.75 | 0.79 | 2  | 85.94  |
| Q8K1Z0 | COQ9   | Ubiquinone biosynthesis protein COQ9 mitochondrial, GN=Coq9      | 1.23 | 0.97 | 0.79 | 1  | 133.48 |
| Q8CIQ7 | DOCK3  | Dedicator of cytokinesis protein 3, GN=Dock3                     | 1.18 | 0.93 | 0.79 | 2  | 148.78 |
| G3X922 | G3X922 | DnaJ heat shock protein family (Hsp40) member C13, GN=Dnajc13    | 1.18 | 0.93 | 0.79 | 1  | 117.85 |
| Q60875 | ARHG2  | Rho guanine nucleotide exchange factor 2, GN=Arhgef2             | 1.32 | 1.04 | 0.79 | 8  | 220.88 |
| Q4ACU6 | SHAN3  | SH3 and multiple ankyrin repeat domains protein 3, GN=Shank3     | 1.22 | 0.96 | 0.79 | 7  | 205.51 |

|        |        |                                                                                            |      |      |      |   |        |
|--------|--------|--------------------------------------------------------------------------------------------|------|------|------|---|--------|
| A2AJQ0 | A2AJQ0 | [Pyruvate dehydrogenase [acetyl-<br>transferring]]-phosphatase 1<br>mitochondrial, GN=Pdp1 | 1.22 | 0.96 | 0.79 | 1 | 123.3  |
| Q6ZVV7 | RL35   | 60S ribosomal protein L35, GN=Rpl35                                                        | 1.03 | 0.81 | 0.79 | 1 | 67.71  |
| Q9Z0J4 | NOS1   | Nitric oxide synthase brain, GN=Nos1                                                       | 1.03 | 0.81 | 0.79 | 6 | 92.13  |
| Q91V77 | Q91V77 | Protein S100, GN=S100a1                                                                    | 1.03 | 0.81 | 0.79 | 1 | 105.07 |
| Q9D8W7 | OCAD2  | OCIA domain-containing protein 2,<br>GN=Ociad2                                             | 1.17 | 0.92 | 0.79 | 2 | 79.85  |
| Q91YW3 | DNJC3  | DnaJ homolog subfamily C member 3,<br>GN=Dnajc3                                            | 1.4  | 1.1  | 0.79 | 1 | 63.39  |
| Q99J99 | THTM   | 3-mercaptopyruvate sulfurtransferase,<br>GN=Mpst                                           | 1.12 | 0.88 | 0.79 | 3 | 167.57 |
| O08915 | AIP    | AH receptor-interacting protein,<br>GN=Aip                                                 | 0.79 | 0.62 | 0.78 | 1 | 150.37 |
| Q6DFW4 | NOP58  | Nucleolar protein 58, GN=Nop58                                                             | 1.3  | 1.02 | 0.78 | 4 | 145.8  |
| Q8CJ19 | MICA3  | [F-actin]-methionine sulfoxide oxidase<br>MICAL3, GN=Mical3                                | 1.3  | 1.02 | 0.78 | 5 | 171.11 |
| P23116 | EIF3A  | Eukaryotic translation initiation factor 3<br>subunit A, GN=Eif3a                          | 1.16 | 0.91 | 0.78 | 8 | 190.78 |
| Q9QUR6 | PPCE   | Prolyl endopeptidase, GN=Prep                                                              | 1.43 | 1.12 | 0.78 | 4 | 187.84 |
| Q7TQG5 | Q7TQG5 | Neogenin, GN=Neo1                                                                          | 0.83 | 0.65 | 0.78 | 1 | 93.92  |
| O08914 | FAAH1  | Fatty-acid amide hydrolase 1, GN=Faah                                                      | 1.52 | 1.19 | 0.78 | 1 | 132.94 |
| P60764 | RAC3   | Ras-related C3 botulinum toxin<br>substrate 3, GN=Rac3                                     | 1.24 | 0.97 | 0.78 | 2 | 159.95 |

|        |       |                                                              |      |      |      |   |        |
|--------|-------|--------------------------------------------------------------|------|------|------|---|--------|
| Q8BKC5 | IPO5  | Importin-5, GN=Ipo5                                          | 1.19 | 0.93 | 0.78 | 4 | 166.87 |
| Q9CZT8 | RAB3B | Ras-related protein Rab-3B, GN=Rab3b                         | 1.37 | 1.07 | 0.78 | 1 | 194.81 |
| Q3UHA3 | SPTCS | Spatacsin, GN=Spg11                                          | 1.09 | 0.85 | 0.78 | 1 | 34.12  |
| Q8VHJ5 | MARK1 | Serine/threonine-protein kinase<br>MARK1, GN=Mark1           | 1.18 | 0.92 | 0.78 | 2 | 189.11 |
| Q3UZP4 | SVIP  | Small VCP/p97-interacting protein,<br>GN=Svip                | 1.27 | 0.99 | 0.78 | 1 | 45.22  |
| P43274 | H14   | Histone H1.4, GN=Hist1h1e                                    | 0.95 | 0.74 | 0.78 | 1 | 125.38 |
| O35465 | FKBP8 | Peptidyl-prolyl cis-trans isomerase<br>FKBP8, GN=Fkbp8       | 1.26 | 0.98 | 0.78 | 2 | 119.82 |
| Q9ERG2 | STRN3 | Striatin-3, GN=Strn3                                         | 1.3  | 1.01 | 0.78 | 4 | 128.66 |
| Q05BC3 | EMAL1 | Echinoderm microtubule-associated<br>protein-like 1, GN=Eml1 | 1.12 | 0.87 | 0.78 | 1 | 138.4  |
| Q61191 | HCFC1 | Host cell factor 1, GN=Hcfc1                                 | 1.15 | 0.89 | 0.77 | 1 | 121.14 |
| Q68FF6 | GIT1  | ARF GTPase-activating protein GIT1,<br>GN=Git1               | 1.15 | 0.89 | 0.77 | 1 | 189.25 |
| P62911 | RL32  | 60S ribosomal protein L32, GN=Rpl32                          | 1.28 | 0.99 | 0.77 | 3 | 127.44 |
| Q06890 | CLUS  | Clusterin, GN=Clu                                            | 1.28 | 0.99 | 0.77 | 7 | 192.02 |
| Q8BWM0 | PGES2 | Prostaglandin E synthase 2, GN=Ptges2                        | 1.28 | 0.99 | 0.77 | 4 | 155.79 |
| Q80U56 | AVL9  | Late secretory pathway protein AVL9<br>homolog, GN=Avl9      | 1.23 | 0.95 | 0.77 | 2 | 116.79 |

|        |        |                                                                             |      |      |      |    |        |
|--------|--------|-----------------------------------------------------------------------------|------|------|------|----|--------|
| Q8BXX8 | AGAP1  | Arf-GAP with GTPase ANK repeat and PH domain-containing protein 1, GN=Agap1 | 0.92 | 0.71 | 0.77 | 1  | 124.2  |
| D3Z6P9 | D3Z6P9 | DEAD (Asp-Glu-Ala-Asp) box polypeptide 43, GN=Ddx43                         | 1.05 | 0.81 | 0.77 | 1  | 22.13  |
| Q9DB73 | NB5R1  | NADH-cytochrome b5 reductase 1, GN=Cyb5r1                                   | 1.31 | 1.01 | 0.77 | 3  | 121.5  |
| P30681 | HMGB2  | High mobility group protein B2, GN=Hmgb2                                    | 1.22 | 0.94 | 0.77 | 1  | 100.67 |
| Q9CS84 | NRX1A  | Neurexin-1, GN=Nrxn1                                                        | 1.22 | 0.94 | 0.77 | 11 | 216.46 |
| Q9JK81 | MYG1   | UPF0160 protein MYG1 mitochondrial, GN=Myg1                                 | 1.21 | 0.93 | 0.77 | 2  | 83.88  |
| Q2PFD7 | PSD3   | PH and SEC7 domain-containing protein 3, GN=Psd3                            | 1.25 | 0.96 | 0.77 | 1  | 255.19 |
| D3YZZ5 | D3YZZ5 | Transmembrane p24-trafficking protein 7, GN=Tmed7                           | 1.25 | 0.96 | 0.77 | 2  | 119    |
| Q08642 | PADI2  | Protein-arginine deiminase type-2, GN=Padi2                                 | 1.24 | 0.95 | 0.77 | 3  | 135.66 |
| Q9WU28 | PFD5   | Prefoldin subunit 5, GN=Pfdn5                                               | 1.28 | 0.98 | 0.77 | 3  | 136.98 |
| Q8BP92 | RCN2   | Reticulocalbin-2, GN=Rcn2                                                   | 1.02 | 0.78 | 0.76 | 2  | 164.72 |
| Q6IR34 | GPSM1  | G-protein-signaling modulator 1, GN=Gpsm1                                   | 1.36 | 1.04 | 0.76 | 1  | 125.69 |
| Q9Z130 | HNRDL  | Heterogeneous nuclear ribonucleoprotein D-like, GN=Hnrnpdl                  | 1.31 | 1    | 0.76 | 2  | 134.99 |
| O88746 | TOM1   | Target of Myb protein 1, GN=Tom1                                            | 1.39 | 1.06 | 0.76 | 1  | 92.93  |
| Q99JR5 | TINAL  | Tubulointerstitial nephritis antigen-like, GN=Tinagl1                       | 1.64 | 1.25 | 0.76 | 1  | 124.91 |

|        |        |                                                                             |      |      |      |   |        |
|--------|--------|-----------------------------------------------------------------------------|------|------|------|---|--------|
| D3YZP9 | CCDC6  | Coiled-coil domain-containing protein 6, GN=Ccdc6                           | 1.26 | 0.96 | 0.76 | 1 | 125.73 |
| Q6PHS9 | CA2D2  | Voltage-dependent calcium channel subunit alpha-2/delta-2, GN=Cacna2d2      | 1.26 | 0.96 | 0.76 | 1 | 136.48 |
| Q9WV18 | GABR1  | Gamma-aminobutyric acid type B receptor subunit 1, GN=Gabbr1                | 1.26 | 0.96 | 0.76 | 2 | 189.37 |
| Q80WJ7 | LYRIC  | Protein LYRIC, GN=Mtdh                                                      | 1.13 | 0.86 | 0.76 | 3 | 134.54 |
| Q8CFI0 | NED4L  | E3 ubiquitin-protein ligase NEDD4-like, GN=Nedd4l                           | 1.17 | 0.89 | 0.76 | 1 | 135.06 |
| Q9D0T1 | NH2L1  | NHP2-like protein 1, GN=Snu13                                               | 1.33 | 1.01 | 0.76 | 2 | 90.59  |
| Q05512 | MARK2  | Serine/threonine-protein kinase MARK2, GN=Mark2                             | 1.16 | 0.88 | 0.76 | 3 | 235.34 |
| P57722 | PCBP3  | Poly(rC)-binding protein 3, GN=Pcbp3                                        | 1.28 | 0.97 | 0.76 | 2 | 181.03 |
| Q60709 | Q60709 | Amyloid-like protein 2, GN=Aplp2                                            | 1.03 | 0.78 | 0.76 | 1 | 104.22 |
| Q8BXV2 | BRI3B  | BRI3-binding protein, GN=Bri3bp                                             | 1.4  | 1.06 | 0.76 | 1 | 98.21  |
| Q9DC61 | MPPA   | Mitochondrial-processing peptidase subunit alpha, GN=Pmpca                  | 1.15 | 0.87 | 0.76 | 1 | 80.45  |
| O88809 | DCX    | Neuronal migration protein doublecortin, GN=Dcx                             | 1.6  | 1.21 | 0.76 | 1 | 141.03 |
| Q505F5 | LRC47  | Leucine-rich repeat-containing protein 47, GN=Lrrc47                        | 1.27 | 0.96 | 0.76 | 7 | 201.29 |
| Q9D554 | SF3A3  | Splicing factor 3A subunit 3, GN=Sf3a3                                      | 1.14 | 0.86 | 0.75 | 1 | 133.92 |
| G3X972 | G3X972 | SEC24 related gene family member C (S. cerevisiae) isoform CRA_a, GN=Sec24c | 1.18 | 0.89 | 0.75 | 2 | 173.46 |

|        |        |                                                                              |      |      |      |   |        |
|--------|--------|------------------------------------------------------------------------------|------|------|------|---|--------|
| Q9CQU3 | RER1   | Protein RER1, GN=Rer1                                                        | 1.42 | 1.07 | 0.75 | 1 | 41.76  |
| Q8K0E8 | FIBB   | Fibrinogen beta chain, GN=Fgb                                                | 1.33 | 1    | 0.75 | 1 | 170.36 |
| Q3UGS4 | MCRI1  | Mapk-regulated corepressor-interacting protein 1, GN=Mcrip1                  | 1.24 | 0.93 | 0.75 | 1 | 54.29  |
| Q8VDP6 | CDIPT  | CDP-diacylglycerol--inositol 3-phosphatidyltransferase, GN=Cdipt             | 1.19 | 0.89 | 0.75 | 2 | 87.07  |
| P13541 | MYH3   | Myosin-3, GN=Myh3                                                            | 1.07 | 0.8  | 0.75 | 1 | 53.7   |
| Q9ERT9 | PPR1A  | Protein phosphatase 1 regulatory subunit 1A, GN=Ppp1r1a                      | 1.07 | 0.8  | 0.75 | 1 | 119.65 |
| Q60902 | EP15R  | Epidermal growth factor receptor substrate 15-like 1, GN=Eps15l1             | 1.5  | 1.12 | 0.75 | 6 | 230    |
| Q9R1R2 | TRIM3  | Tripartite motif-containing protein 3, GN=Trim3                              | 1.46 | 1.09 | 0.75 | 1 | 134.38 |
| F7BJK1 | F7BJK1 | Protocadherin 1 (Fragment), GN=Pcdh1                                         | 1.49 | 1.11 | 0.74 | 1 | 170.81 |
| P05132 | KAPCA  | cAMP-dependent protein kinase catalytic subunit alpha, GN=Prkaca             | 0.98 | 0.73 | 0.74 | 1 | 154.04 |
| O08919 | NUMBL  | Numb-like protein, GN=Numbl                                                  | 1.21 | 0.9  | 0.74 | 4 | 204.38 |
| Q922Q9 | CHID1  | Chitinase domain-containing protein 1, GN=Chid1                              | 1.21 | 0.9  | 0.74 | 3 | 126.46 |
| P70362 | UFD1   | Ubiquitin recognition factor in ER-associated degradation protein 1, GN=Ufd1 | 1.44 | 1.07 | 0.74 | 1 | 93.06  |
| Q8VDP4 | CCAR2  | Cell cycle and apoptosis regulator protein 2, GN=Ccar2                       | 1.31 | 0.97 | 0.74 | 4 | 151.89 |
| Q61733 | RT31   | 28S ribosomal protein S31 mitochondrial, GN=Mrps31                           | 1.46 | 1.08 | 0.74 | 1 | 61.51  |

|            |            |                                                                                |      |      |      |   |        |
|------------|------------|--------------------------------------------------------------------------------|------|------|------|---|--------|
| A0A1D5RL96 | A0A1D5RL96 | Uncharacterized protein,<br>GN=A830010M20Rik                                   | 1.3  | 0.96 | 0.74 | 1 | 138.74 |
| Q6ZPQ6     | PITM2      | Membrane-associated<br>phosphatidylinositol transfer protein 2,<br>GN= Pitpm2  | 1.49 | 1.1  | 0.74 | 2 | 137.76 |
| P58021     | TM9S2      | Transmembrane 9 superfamily member<br>2, GN= Tm9sf2                            | 1.37 | 1.01 | 0.74 | 3 | 108.28 |
| Q61290     | CAC1E      | Voltage-dependent R-type calcium<br>channel subunit alpha-1E, GN= Cacna1e      | 1.29 | 0.95 | 0.74 | 2 | 166.94 |
| Q9CZ04     | CSN7A      | COP9 signalosome complex subunit 7a,<br>GN= Cops7a                             | 1.36 | 1    | 0.74 | 2 | 117.15 |
| Q9D8S4     | ORN        | Oligoribonuclease mitochondrial,<br>GN= Rexo2                                  | 1.17 | 0.86 | 0.74 | 1 | 87.64  |
| A2CG35     | A2CG35     | Ras-related protein Rab-12, GN= Rab12                                          | 1.13 | 0.83 | 0.73 | 2 | 137.61 |
| Q9CQX8     | RT36       | 28S ribosomal protein S36<br>mitochondrial, GN= Mrps36                         | 1.31 | 0.96 | 0.73 | 1 | 117.77 |
| Q9R020     | ZRAB2      | Zinc finger Ran-binding domain-<br>containing protein 2, GN= Zranb2            | 1.25 | 0.91 | 0.73 | 1 | 50.07  |
| Q8CGF6     | WDR47      | WD repeat-containing protein 47,<br>GN= Wdr47                                  | 0.84 | 0.61 | 0.73 | 1 | 190.93 |
| O35495     | CDK14      | Cyclin-dependent kinase 14,<br>GN= Cdk14                                       | 1.38 | 1    | 0.72 | 2 | 93.54  |
| G3X9K3     | BIG1       | Brefeldin A-inhibited guanine<br>nucleotide-exchange protein 1,<br>GN= Arfgef1 | 1.37 | 0.99 | 0.72 | 1 | 113.92 |
| Q69Z26     | CNTN4      | Contactin-4, GN= Cntn4                                                         | 1.47 | 1.06 | 0.72 | 3 | 106.38 |
| Q8K2K6     | AGFG1      | Arf-GAP domain and FG repeat-<br>containing protein 1, GN= Agfg1               | 1.29 | 0.93 | 0.72 | 2 | 128.25 |



|            |            |                                                              |      |      |      |   |        |
|------------|------------|--------------------------------------------------------------|------|------|------|---|--------|
| Q3V132     | ADT4       | ADP/ATP translocase 4, GN=Slc25a31                           | 1.03 | 0.74 | 0.72 | 1 | 164.35 |
| Q9CR09     | UFC1       | Ubiquitin-fold modifier-conjugating enzyme 1, GN=Ufc1        | 1.17 | 0.84 | 0.72 | 1 | 40.44  |
| Q08274     | DMWD       | Dystrophia myotonica WD repeat-containing protein, GN=Dmwd   | 1.24 | 0.89 | 0.72 | 1 | 92.86  |
| P15864     | H12        | Histone H1.2, GN=Hist1h1c                                    | 1.06 | 0.76 | 0.72 | 2 | 127.31 |
| Q91XF0     | PNPO       | Pyridoxine-5'-phosphate oxidase, GN=Pnp0                     | 1.76 | 1.26 | 0.72 | 1 | 93.66  |
| Q80TL1     | ADCY2      | Adenylate cyclase type 2, GN=Adcy2                           | 1.44 | 1.03 | 0.72 | 1 | 137.21 |
| Q68ED7     | CRTC1      | CREB-regulated transcription coactivator 1, GN=Crtc1         | 1.36 | 0.97 | 0.71 | 2 | 112.58 |
| Q5SWU9     | ACACA      | Acetyl-CoA carboxylase 1, GN=Acaca                           | 1.16 | 0.82 | 0.71 | 2 | 105.47 |
| Q99LD9     | EI2BB      | Translation initiation factor eIF-2B subunit beta, GN=Eif2b2 | 1.39 | 0.98 | 0.71 | 2 | 100.06 |
| A2A432     | CUL4B      | Cullin-4B, GN=Cul4b                                          | 1.22 | 0.86 | 0.70 | 1 | 145.59 |
| Q8R1F1     | NIBL1      | Niban-like protein 1, GN=Fam129b                             | 1.53 | 1.07 | 0.70 | 1 | 67.7   |
| Q8BP48     | MAP11      | Methionine aminopeptidase 1, GN=Metap1                       | 1.59 | 1.11 | 0.70 | 2 | 74.25  |
| Q8BSN6     | Q8BSN6     | Putative uncharacterized protein, GN=Vamp4                   | 1.19 | 0.83 | 0.70 | 1 | 94.8   |
| Q501J6     | DDX17      | Probable ATP-dependent RNA helicase DDX17, GN=Ddx17          | 1.32 | 0.92 | 0.70 | 4 | 211.06 |
| A0A087WNZ7 | A0A087WNZ7 | E3 ubiquitin-protein ligase TRIP12, GN=Trip12                | 1.32 | 0.92 | 0.70 | 1 | 76.38  |

|        |        |                                                                                       |      |      |      |   |        |
|--------|--------|---------------------------------------------------------------------------------------|------|------|------|---|--------|
| O88696 | CLPP   | ATP-dependent Clp protease proteolytic subunit mitochondrial, GN=Clpp                 | 1.45 | 1.01 | 0.70 | 1 | 125.11 |
| Q9WVF8 | TUSC2  | Tumor suppressor candidate 2, GN=Tusc2                                                | 1.45 | 1.01 | 0.70 | 1 | 110.21 |
| P49025 | CTRO   | Citron Rho-interacting kinase, GN=Cit                                                 | 0.98 | 0.68 | 0.69 | 2 | 116.99 |
| A2AJA9 | CI172  | Uncharacterized protein C9orf172 homolog, GN=Gm996                                    | 1.2  | 0.83 | 0.69 | 2 | 100.78 |
| D3YWQ0 | D3YWQ0 | Diacylglycerol kinase, GN=Dgki                                                        | 1.52 | 1.05 | 0.69 | 2 | 149.89 |
| Q9R226 | KHDR3  | KH domain-containing RNA-binding signal transduction-associated protein 3, GN=Khdrbs3 | 1.22 | 0.84 | 0.69 | 2 | 121.77 |
| P60824 | CIRBP  | Cold-inducible RNA-binding protein, GN=Cirbp                                          | 1.25 | 0.86 | 0.69 | 2 | 138.18 |
| Q99JB2 | STML2  | Stomatin-like protein 2 mitochondrial, GN=Stoml2                                      | 1.25 | 0.86 | 0.69 | 1 | 175.35 |
| Q9QXL1 | KI21B  | Kinesin-like protein KIF21B, GN=Kif21b                                                | 0.64 | 0.44 | 0.69 | 1 | 142.49 |
| Q99KP3 | CRYL1  | Lambda-crystallin homolog, GN=Cryl1                                                   | 1.37 | 0.94 | 0.69 | 1 | 109.61 |
| Q9QZD8 | DIC    | Mitochondrial dicarboxylate carrier, GN=Slc25a10                                      | 1.33 | 0.91 | 0.68 | 2 | 121.54 |
| Q3TCH7 | CUL4A  | Cullin-4A, GN=Cul4a                                                                   | 1.32 | 0.9  | 0.68 | 1 | 114.08 |
| O08810 | U5S1   | 116 kDa U5 small nuclear ribonucleoprotein component, GN=Eftud2                       | 1.43 | 0.97 | 0.68 | 3 | 171.5  |
| P35278 | RAB5C  | Ras-related protein Rab-5C, GN=Rab5c                                                  | 1.49 | 1.01 | 0.68 | 2 | 176.31 |

|        |        |                                                                   |      |      |      |   |        |
|--------|--------|-------------------------------------------------------------------|------|------|------|---|--------|
| Q8K0T4 | KATL1  | Katanin p60 ATPase-containing subunit A-like 1, GN=Katnal1        | 1.21 | 0.82 | 0.68 | 1 | 76.17  |
| P97823 | LYPA1  | Acyl-protein thioesterase 1, GN=Lypla1                            | 1.61 | 1.07 | 0.66 | 1 | 118.34 |
| Q8R2Z3 | S26A7  | Anion exchange transporter, GN=Slc26a7                            | 1.36 | 0.9  | 0.66 | 1 | 26.1   |
| P56212 | ARP19  | cAMP-regulated phosphoprotein 19, GN=Arpp19                       | 1.67 | 1.1  | 0.66 | 1 | 79.81  |
| Q8BX94 | OSBL2  | Oxysterol-binding protein-related protein 2, GN=Osblp2            | 1.51 | 0.99 | 0.66 | 1 | 62.67  |
| Q80XI3 | IF4G3  | Eukaryotic translation initiation factor 4 gamma 3, GN=Eif4g3     | 1.34 | 0.87 | 0.65 | 3 | 143.96 |
| P03888 | NU1M   | NADH-ubiquinone oxidoreductase chain 1, GN=Mtnd1                  | 1.11 | 0.72 | 0.65 | 1 | 74.11  |
| Q8R1S0 | COQ6   | Ubiquinone biosynthesis monooxygenase COQ6 mitochondrial, GN=Coq6 | 1.65 | 1.07 | 0.65 | 3 | 66.33  |
| P50096 | IMDH1  | Inosine-5'-monophosphate dehydrogenase 1, GN=Impdh1               | 1.53 | 0.98 | 0.64 | 1 | 100.2  |
| D3Z3B8 | D3Z3B8 | Disks large homolog 1, GN=Dlg1                                    | 0.99 | 0.63 | 0.64 | 1 | 223.24 |
| Q0GNC1 | INF2   | Inverted formin-2, GN=Inf2                                        | 0.93 | 0.59 | 0.63 | 1 | 74.05  |
| Q61033 | LAP2A  | Lamina-associated polypeptide 2 isoforms alpha/zeta, GN=Tmpo      | 1.33 | 0.84 | 0.63 | 2 | 115.13 |
| A2ACM0 | A2ACM0 | Putative uncharacterized protein, GN=Rptor                        | 1.58 | 0.99 | 0.63 | 1 | 124.14 |
| Q3TCR7 | Q3TCR7 | Dynamin-2, GN=Dnm2                                                | 1.9  | 1.19 | 0.63 | 1 | 246.27 |
| Q3U5Q7 | CMPK2  | UMP-CMP kinase 2 mitochondrial, GN=Cmpk2                          | 1.55 | 0.97 | 0.63 | 1 | 102.4  |

|        |        |                                                                |      |      |      |   |        |
|--------|--------|----------------------------------------------------------------|------|------|------|---|--------|
| Q9ES56 | TPPC4  | Trafficking protein particle complex subunit 4, GN=Trappc4     | 1.7  | 1.06 | 0.62 | 2 | 80.53  |
| P97372 | PSME2  | Proteasome activator complex subunit 2, GN=Psme2               | 1.35 | 0.84 | 0.62 | 1 | 55.85  |
| Q9DD18 | DTD1   | D-tyrosyl-tRNA(Tyr) deacylase 1, GN=Dtd1                       | 1.24 | 0.77 | 0.62 | 1 | 80.82  |
| Q3UMU9 | HDGR2  | Hepatoma-derived growth factor-related protein 2, GN=Hdglf2    | 1.26 | 0.77 | 0.61 | 1 | 51.49  |
| P48193 |        | 41 Protein 4.1, GN=Epb41                                       | 1.95 | 1.19 | 0.61 | 1 | 119.64 |
| P62806 | H4     | Histone H4, GN=Hist1h4a                                        | 0.82 | 0.5  | 0.61 | 9 | 218.73 |
| Q7TQK5 | CCD93  | Coiled-coil domain-containing protein 93, GN=Ccdc93            | 1.52 | 0.92 | 0.61 | 1 | 113.44 |
| F8VQ05 | F8VQ05 | FRY-like transcription coactivator, GN=Fryl                    | 1.65 | 0.98 | 0.59 | 1 | 80.5   |
| P21300 | ALD1   | Aldose reductase-related protein 1, GN=Akr1b7                  | 1.57 | 0.93 | 0.59 | 1 | 108.52 |
| Q9WVA4 | TAGL2  | Transgelin-2, GN=Tagln2                                        | 1.78 | 1.04 | 0.58 | 3 | 167.3  |
| E0CY16 | E0CY16 | Cell adhesion molecule 1, GN=Cadm1                             | 1.7  | 0.99 | 0.58 | 1 | 196.6  |
| Q9JMD3 | STA10  | START domain-containing protein 10, GN=Stard10                 | 2.1  | 1.22 | 0.58 | 1 | 111.59 |
| B2RWC4 | B2RWC4 | Gm88 protein, GN=Lrrc73                                        | 1.56 | 0.89 | 0.57 | 1 | 59.7   |
| Q80VC9 | CAMP3  | Calmodulin-regulated spectrin-associated protein 3, GN=Camsap3 | 1.58 | 0.9  | 0.57 | 2 | 139.98 |
| Q9D2V7 | CORO7  | Coronin-7, GN=Coro7                                            | 1.67 | 0.94 | 0.56 | 1 | 91.11  |

|            |            |                                                   |      |      |      |   |        |
|------------|------------|---------------------------------------------------|------|------|------|---|--------|
| P33175     | KIF5A      | Kinesin heavy chain isoform 5A,<br>GN=Kif5a       | 1.87 | 1.01 | 0.54 | 1 | 204.56 |
| P28028     | BRAF       | Serine/threonine-protein kinase B-raf,<br>GN=Braf | 1.84 | 0.98 | 0.53 | 1 | 135.32 |
| D3YXJ0     | D3YXJ0     | Diacylglycerol kinase, GN=Dgkh                    | 1.61 | 0.85 | 0.53 | 2 | 130.16 |
| A2AWT6     | A2AWT6     | Nucleolar transcription factor 1,<br>GN=Ubtf      | 1.98 | 1.03 | 0.52 | 1 | 54.85  |
| P97492     | RGS14      | Regulator of G-protein signaling 14,<br>GN=Rgs14  | 1.52 | 0.79 | 0.52 | 1 | 71.21  |
| A0A087WRT4 | A0A087WRT4 | FAT atypical cadherin 1, GN=Fat1                  | 1.77 | 0.89 | 0.50 | 1 | 32.29  |
| A8DUK4     | A8DUK4     | Beta-globin, GN=Hbbt1                             | 0.71 | 0.33 | 0.46 | 4 | 273.67 |
| P26041     | MOES       | Moesin, GN=Msn                                    | 2    | 0.82 | 0.41 | 1 | 188.76 |

---

**Table S-4. The 50 proteins in the cerebral cortical that were changed significantly by memantine treatment.**

**Table S-4. The 50 proteins in the cerebral cortical that were changed significantly by memantine treatment.** These proteins have met the criteria, the ratio of memantine / AD in expression levels of at least 1.5-fold ( up-regulation ) or at least <0.66-fold (down-regulation) as defined in the experimental procedures.

| Accession | Protein name | Description                                                                | Ratio |              |              | Unique | -10lgP |
|-----------|--------------|----------------------------------------------------------------------------|-------|--------------|--------------|--------|--------|
|           |              |                                                                            | AD/WT | Memantine/WT | Memantine/AD |        |        |
| Q9CXT8    | MPPB         | Mitochondrial-processing peptidase subunit beta, GN=Pmpcb                  | 0.98  | 2.64         | 2.69         | 1      | 89.76  |
| P48725    | PCNT         | Pericentrin, GN=Pcnt                                                       | 0.93  | 2.44         | 2.62         | 1      | 83.85  |
| Q91X96    | MSS4         | Guanine nucleotide exchange factor MSS4, GN=Rabif                          | 0.92  | 1.95         | 2.12         | 1      | 38.67  |
| Q6X893    | CTL1         | Choline transporter-like protein 1, GN=Slc44a1                             | 0.66  | 1.36         | 2.06         | 1      | 154.36 |
| Q9CQB5    | CISD2        | CDGSH iron-sulfur domain-containing protein 2, GN=Cisd2                    | 1.05  | 2.07         | 1.97         | 1      | 64.37  |
| Q64010    | CRK          | Adapter molecule crk, GN=Crk                                               | 1.02  | 1.88         | 1.84         | 1      | 201.47 |
| P50153    | GBG4         | Guanine nucleotide-binding protein G(I)/G(S)/G(O) subunit gamma-4, GN=Gng4 | 0.73  | 1.33         | 1.82         | 2      | 111.86 |
| Q8C129    | LCAP         | Leucyl-cystinyl aminopeptidase, GN=Lnpep                                   | 0.48  | 0.84         | 1.75         | 1      | 82.37  |
| F6TYB7    | F6TYB7       | Myelin basic protein (Fragment), GN=Mbp                                    | 0.89  | 1.44         | 1.62         | 2      | 261.39 |
| Q3TDN2    | FAF2         | FAS-associated factor 2, GN=Faf2                                           | 0.9   | 1.43         | 1.59         | 1      | 117.52 |

|        |        |                                                                      |      |      |      |   |        |
|--------|--------|----------------------------------------------------------------------|------|------|------|---|--------|
| Q6PGB8 | SMCA1  | Probable global transcription activator<br>SNF2L1, GN=Smarca1        | 0.96 | 1.5  | 1.56 | 1 | 66.05  |
| P55258 | RAB8A  | Ras-related protein Rab-8A, GN=Rab8a                                 | 1.16 | 1.81 | 1.56 | 1 | 167.34 |
| P83870 | PHF5A  | PHD finger-like domain-containing<br>protein 5A, GN=Phf5a            | 0.38 | 0.59 | 1.55 | 1 | 72.42  |
| Q9D4H1 | EXOC2  | Exocyst complex component 2,<br>GN=Exoc2                             | 0.94 | 1.45 | 1.54 | 1 | 128.79 |
| P97823 | LYPA1  | Acyl-protein thioesterase 1, GN=Lypla1                               | 1.61 | 1.07 | 0.66 | 1 | 118.34 |
| Q8R2Z3 | S26A7  | Anion exchange transporter, GN=Slc26a7                               | 1.36 | 0.9  | 0.66 | 1 | 26.1   |
| P56212 | ARP19  | cAMP-regulated phosphoprotein 19,<br>GN=Arpp19                       | 1.67 | 1.1  | 0.66 | 1 | 79.81  |
| Q8BX94 | OSBL2  | Oxysterol-binding protein-related protein<br>2, GN=Osbp12            | 1.51 | 0.99 | 0.66 | 1 | 62.67  |
| Q80XI3 | IF4G3  | Eukaryotic translation initiation factor 4<br>gamma 3, GN=Eif4g3     | 1.34 | 0.87 | 0.65 | 3 | 143.96 |
| P03888 | NU1M   | NADH-ubiquinone oxidoreductase chain<br>1, GN=Mtnd1                  | 1.11 | 0.72 | 0.65 | 1 | 74.11  |
| Q8R1S0 | COQ6   | Ubiquinone biosynthesis monooxygenase<br>COQ6 mitochondrial, GN=Coq6 | 1.65 | 1.07 | 0.65 | 3 | 66.33  |
| P50096 | IMDH1  | Inosine-5'-monophosphate dehydrogenase<br>1, GN=Impdh1               | 1.53 | 0.98 | 0.64 | 1 | 100.2  |
| D3Z3B8 | D3Z3B8 | Disks large homolog 1, GN=Dlg1                                       | 0.99 | 0.63 | 0.64 | 1 | 223.24 |
| Q0GNC1 | INF2   | Inverted formin-2, GN=Inf2                                           | 0.93 | 0.59 | 0.63 | 1 | 74.05  |
| Q61033 | LAP2A  | Lamina-associated polypeptide 2<br>isoforms alpha/zeta, GN=Tmpo      | 1.33 | 0.84 | 0.63 | 2 | 115.13 |

|        |        |                                                                |      |      |      |   |        |
|--------|--------|----------------------------------------------------------------|------|------|------|---|--------|
| A2ACM0 | A2ACM0 | Putative uncharacterized protein,<br>GN=Rptor                  | 1.58 | 0.99 | 0.63 | 1 | 124.14 |
| Q3TCR7 | Q3TCR7 | Dynamain-2, GN=Dnm2                                            | 1.9  | 1.19 | 0.63 | 1 | 246.27 |
| Q3U5Q7 | CMPK2  | UMP-CMP kinase 2 mitochondrial,<br>GN=Cmpk2                    | 1.55 | 0.97 | 0.63 | 1 | 102.4  |
| Q9ES56 | TPPC4  | Trafficking protein particle complex<br>subunit 4, GN=Trappc4  | 1.7  | 1.06 | 0.62 | 2 | 80.53  |
| P97372 | PSME2  | Proteasome activator complex subunit 2,<br>GN=Psme2            | 1.35 | 0.84 | 0.62 | 1 | 55.85  |
| Q9DD18 | DTD1   | D-tyrosyl-tRNA(Tyr) deacylase 1,<br>GN=Dtd1                    | 1.24 | 0.77 | 0.62 | 1 | 80.82  |
| Q3UMU9 | HDGR2  | Hepatoma-derived growth factor-related<br>protein 2, GN=Hdglf2 | 1.26 | 0.77 | 0.61 | 1 | 51.49  |
| P48193 | 41     | Protein 4.1, GN=Epb41                                          | 1.95 | 1.19 | 0.61 | 1 | 119.64 |
| P62806 | H4     | Histone H4, GN=Hist1h4a                                        | 0.82 | 0.5  | 0.61 | 9 | 218.73 |
| Q7TQK5 | CCD93  | Coiled-coil domain-containing protein 93,<br>GN=Ccdc93         | 1.52 | 0.92 | 0.61 | 1 | 113.44 |
| F8VQ05 | F8VQ05 | FRY-like transcription coactivator,<br>GN=Fryl                 | 1.65 | 0.98 | 0.59 | 1 | 80.5   |
| P21300 | ALD1   | Aldose reductase-related protein 1,<br>GN=Akr1b7               | 1.57 | 0.93 | 0.59 | 1 | 108.52 |
| Q9WVA4 | TAGL2  | Transgelin-2, GN=Tagln2                                        | 1.78 | 1.04 | 0.58 | 3 | 167.3  |
| E0CY16 | E0CY16 | Cell adhesion molecule 1, GN=Cadm1                             | 1.7  | 0.99 | 0.58 | 1 | 196.6  |
| Q9JMD3 | STA10  | START domain-containing protein 10,<br>GN=Stard10              | 2.1  | 1.22 | 0.58 | 1 | 111.59 |



|            |                               |                                                                |      |      |      |   |        |
|------------|-------------------------------|----------------------------------------------------------------|------|------|------|---|--------|
| B2RWC4     | B2RWC4                        | Gm88 protein, GN=Lrrc73                                        | 1.56 | 0.89 | 0.57 | 1 | 59.7   |
| Q80VC9     | CAMP3                         | Calmodulin-regulated spectrin-associated protein 3, GN=Camsap3 | 1.58 | 0.9  | 0.57 | 2 | 139.98 |
| Q9D2V7     | CORO7                         | Coronin-7, GN=Coro7                                            | 1.67 | 0.94 | 0.56 | 1 | 91.11  |
| P33175     | KIF5A                         | Kinesin heavy chain isoform 5A, GN=Kif5a                       | 1.87 | 1.01 | 0.54 | 1 | 204.56 |
| P28028     | BRAF                          | Serine/threonine-protein kinase B-raf, GN=Braf                 | 1.84 | 0.98 | 0.53 | 1 | 135.32 |
| D3YXJ0     | D3YXJ0                        | Diacylglycerol kinase, GN=Dgkh                                 | 1.61 | 0.85 | 0.53 | 2 | 130.16 |
| A2AWT6     | A2AWT6                        | Nucleolar transcription factor 1, GN=Ubtf                      | 1.98 | 1.03 | 0.52 | 1 | 54.85  |
| P97492     | RGS14                         | Regulator of G-protein signaling 14, GN=Rgs14                  | 1.52 | 0.79 | 0.52 | 1 | 71.21  |
| A0A087WRT4 | FAT<br>atypical<br>cadherin 1 | FAT atypical cadherin 1, GN=Fat1                               | 1.77 | 0.89 | 0.50 | 1 | 32.29  |
| P26041     | MOES                          | Moesin, GN=Msn                                                 | 2    | 0.82 | 0.41 | 1 | 188.76 |
